# Supplementary material for: Chemoenzymatic Synthesis of Optically Active Ethereal Analog of iso-Moramide—A Novel Potentially Powerful Analgesic †
Source: MDPI journal article supplement (doi:10.3390/ijms231911803), 2022-10-05

**Supporting Information**  
for  
**Chemoenzymatic Synthesis of Optically Active  
Ethereal Analog of *iso*-Moramide –  
a Novel Potentially Powerful Analgesic**

Paweł Borowiecki

Laboratory of Biocatalysis and Biotransformation, Department of Drugs Technology and Biotechnology, Warsaw University of Technology, Koszykowa St. 75, 00-662 Warsaw, Poland. Correspondence: pawel.borowiecki@pw.edu.pl

**Table of contents**

|                                                                                                         |         |
|---------------------------------------------------------------------------------------------------------|---------|
| <b>Table S1.</b> List of commercial enzyme preparations employed in these studies .....                 | S2      |
| <b>Table S2.</b> The results of specific rotation values for optically active products .....            | S2      |
| <b>Table S3.</b> Analytical separation conditions of studied compounds by GC column .....               | S3      |
| <b>Table S4.</b> HPLC analytical separation conditions of racemic compounds .....                       | S4      |
| <b>Table S5.</b> Docking scoring for ligands complexed with opioid receptors (ORs) .....                | S5–S8   |
| <b>Table S6.</b> Crystal data and structure refinement parameters for ( <i>R</i> )-(–)- <b>10</b> ..... | S9      |
| Copies of HPLC chromatograms .....                                                                      | S10–S12 |
| Copies of NMR, MS, and FT-IR spectra .....                                                              | S13–S36 |

**Table S1. List of commercial enzyme preparations employed in these studies.**

| Enzyme and its origin (microorganism/tissue)                                   | Enzyme preparation <sup>[a]</sup> (brand name) | Usage form of enzyme preparation                                                            | Enzyme specified activity                   | Commercial supplier                |
|--------------------------------------------------------------------------------|------------------------------------------------|---------------------------------------------------------------------------------------------|---------------------------------------------|------------------------------------|
| Lipase from <i>Candida antarctica</i> B (CAL-B)                                | Novozym 435                                    | immobilized on macroporous acrylic resin [poly (methyl methacrylate-co-butyl methacrylate)] | >10000 U/g or 10 PLU/mg, water content 1.4% | Novozymes A/S                      |
|                                                                                | Chirazyme L-2, c.-f., C2, Lyo.                 | immobilized on the carrier-fixed (carrier 2)                                                | 150 kU                                      | Roche                              |
|                                                                                | Chirazyme L-2, c.-f., C3, Lyo.                 | immobilized on the carrier-fixed (carrier 3)                                                | 150 kU                                      | Roche                              |
| Lipase from <i>Candida antarctica</i> A (CAL-A)                                | Chirazyme L-5                                  | native                                                                                      | unspecified                                 | Boehringer Mannheim <sup>[b]</sup> |
| Lipase from <i>Burkholderia cepacia</i> (formerly <i>Pseudomonas cepacia</i> ) | Amano PS                                       | native                                                                                      | >23.000 U/g                                 | Amano Pharmaceutical Co., Ltd.     |
|                                                                                | Amano PS-IM                                    | immobilized on diatomite                                                                    | 500 U/g                                     | Amano Pharmaceutical Co., Ltd.     |
|                                                                                | PS-Immobead 150                                | immobilized on Immobead 150                                                                 | ≥900 U/g                                    | Sigma-Aldrich                      |
| Lipase from <i>Pseudomonas fluorescens</i>                                     | Amano AK                                       | native                                                                                      | >20.000 U/g                                 | Amano Pharmaceutical Co., Ltd.     |

[a] All commercial formulations of enzymes studied herein were used without pre-treatment.

[b] Currently: Roche Diagnostics.

**Table S2. The results of specific rotation values for optically active products.**

| Compound                                                                                          | ee [%] | Measured specific rotation $[\alpha]_D$                  | Literature specific rotation $[\alpha]_D^{\text{lit.}}$ |
|---------------------------------------------------------------------------------------------------|--------|----------------------------------------------------------|---------------------------------------------------------|
| <br>(S)-(+)-3  | >99    | $[\alpha]_D^{27.5} = +50.40$ (c 1.3, CHCl <sub>3</sub> ) | Lack of data                                            |
| <br>(R)-(-)-3  | 98     | $[\alpha]_D^{22} = -73.03$ (c 1.8, CHCl <sub>3</sub> )   | Lack of data                                            |
| <br>(R)-(-)-4a | 99     | $[\alpha]_D^{27.5} = -4.66$ (c 1.2, CHCl <sub>3</sub> )  | Lack of data                                            |
| <br>(R)-(-)-5  | >99    | $[\alpha]_D^{22} = -19.87$ (c 2.3, CHCl <sub>3</sub> )   | Lack of data                                            |
| <br>(S)-(+)-5  | 98     | $[\alpha]_D^{22} = +23.00$ (c 1.3, CHCl <sub>3</sub> )   | Lack of data                                            |
| <br>(R)-(-)-10 | 89     | $[\alpha]_D^{22} = -22.6$ (c 1.9, CHCl <sub>3</sub> )    | Lack of data                                            |
| <br>(S)-(+)-10 | 87     | $[\alpha]_D^{22} = +19.2$ (c 1.8, CHCl <sub>3</sub> )    | Lack of data                                            |

**Table S3. Analytical separation conditions of studied compounds by GC column.**

| Compound                                                                                                | Temperature program [°C]                      | Retention time [min] |
|---------------------------------------------------------------------------------------------------------|-----------------------------------------------|----------------------|
| 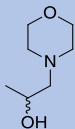<br><i>rac-3</i>       | 80–260 (10 °C/min)                            | 4.43                 |
|                                                                                                         | 120–260 (10 °C/min)                           | 2.20                 |
| <br><i>rac-4a</i>      | 80–260 (10 °C/min)                            | 6.39                 |
|                                                                                                         | 120–260 (10 °C/min)                           | 3.28                 |
| <br><i>rac-4b</i>      | 120–260 (10 °C/min)                           | 4.98                 |
| <br><i>rac-4c</i>     | 120–260 (10 °C/min)                           | 11.15                |
| <br><i>rac-5</i>     | 80–260 (10 °C/min)                            | 4.66                 |
| <br><i>rac-5-SPh</i> | 80–260 (10 °C/min)                            | 15.24                |
| <br><b>9</b>         | 150–260 (10 °C/min)                           | 14.83                |
| <br><i>rac-10</i>    | 250–260 (10 °C/min) and then 15 min at 260 °C | 30.45                |

**Table S4. HPLC analytical separation conditions of racemic compounds.**

| Compound                                                                                                                                                                                                                                              | HPLC Column    | Mobile Phase                                                                        | Flow Rate<br>[mL/min]<br>/ Pressure<br>[MPa] | Detection<br>[nm] /<br>Temperature<br>[°C] | Retention<br>Time<br>[min]                        |
|-------------------------------------------------------------------------------------------------------------------------------------------------------------------------------------------------------------------------------------------------------|----------------|-------------------------------------------------------------------------------------|----------------------------------------------|--------------------------------------------|---------------------------------------------------|
| 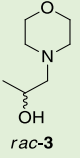<br><chem>C[C@H](O)CN1CCOCC1</chem><br><i>rac-3</i>                                                                                                                  | Chiralpak AD-H | <i>n</i> -hexane/EtOH<br>(90:10, v/v)                                               | 0.6 / 2.7                                    | 208 / 30                                   | 14.611 ( <i>R</i> )<br>and<br>16.213 ( <i>S</i> ) |
| <br><chem>CC1(C)CCN2CCOCC2CC1Cl</chem> $\xrightarrow{\text{[a]}}$ <chem>CC1(C)CCN2CCOCC2CC1SPh</chem><br><i>rac-5</i> $\rightarrow$ <i>rac-5-SPh</i><br>(see: 3.11.) | Chiralcel OJ-H | <i>n</i> -hexane/ <i>tert</i> -<br>ButOH/Et <sub>3</sub> N<br>(96.5:3.0:0.5, v/v/v) | 1.0 / 4.4                                    | 254 / 30                                   | 19.417 ( <i>R</i> )<br>and<br>20.940 ( <i>S</i> ) |
| <br><chem>CC1(C)CCN2CCOCC2CC1C(=O)C(=O)C3=CC=CC=C3C4=CC=CC=C4C5=CC=CC=C5C6=CC=CC=C6C7=CC=CC=C7C8=CC=CC=C8C9=CC=CC=C9C10=CC=CC=C10</chem><br><i>rac-10</i>            | Chiralcel OD-H | <i>n</i> -hexane/2-PrOH<br>(90:10, v/v)                                             | 0.8 / 3.0                                    | 222 / 30                                   | 9.026 ( <i>S</i> )<br>and<br>19.519 ( <i>R</i> )  |

[a] Derivatization of *rac-5* into *rac-5-SPh* was performed using thiophenol (10 equiv) in EtONa (10 equiv)/EtOH, 12 h at 25 °C.

**Table S5. Docking scoring of the respective ligands complexed with opioid receptors (ORs).**

| Entry | Ligand                                                                                          | OR                             | Pose <sup>[a]</sup> | Affinity<br>(kcal/mol) | Distance from best mode <sup>[b]</sup> |           |
|-------|-------------------------------------------------------------------------------------------------|--------------------------------|---------------------|------------------------|----------------------------------------|-----------|
|       |                                                                                                 |                                |                     |                        | rmsd l.b.                              | rmsd u.b. |
| 1     | 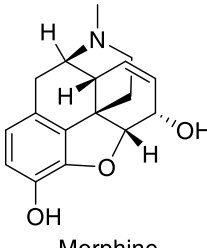<br>Morphine   | $\mu$ -OR<br>(PDB ID: 4DKL)    | S1                  | -7.9                   | 0.000                                  | 0.000     |
| 2     |                                                                                                 |                                | S2                  | -7.7                   | 8.375                                  | 10.081    |
| 3     |                                                                                                 |                                | S3                  | -7.5                   | 2.560                                  | 4.445     |
| 4     |                                                                                                 |                                | S4                  | -7.1                   | 8.092                                  | 10.366    |
| 5     |                                                                                                 |                                | S5                  | -6.9                   | 9.020                                  | 10.999    |
| 6     |                                                                                                 |                                | S6                  | -6.9                   | 9.524                                  | 11.945    |
| 7     |                                                                                                 |                                | S7                  | -6.9                   | 8.563                                  | 11.057    |
| 8     |                                                                                                 |                                | S8                  | -6.8                   | 8.938                                  | 11.097    |
| 9     |                                                                                                 |                                | S9                  | -6.7                   | 8.338                                  | 10.729    |
| 10    |                                                                                                 | $\delta$ -OR<br>(PDB ID: 4EJ4) | S1                  | -7.6                   | 0.000                                  | 0.000     |
| 11    |                                                                                                 |                                | S2                  | -7.3                   | 2.561                                  | 4.265     |
| 12    |                                                                                                 |                                | S3                  | -6.1                   | 2.275                                  | 4.311     |
| 13    |                                                                                                 |                                | S4                  | -6.1                   | 15.622                                 | 17.950    |
| 14    |                                                                                                 |                                | S5                  | -6.1                   | 12.937                                 | 15.126    |
| 15    |                                                                                                 |                                | S6                  | -6.0                   | 16.654                                 | 18.709    |
| 16    |                                                                                                 |                                | S7                  | -6.0                   | 11.256                                 | 13.364    |
| 17    |                                                                                                 |                                | S8                  | -6.0                   | 11.356                                 | 13.831    |
| 18    |                                                                                                 |                                | S9                  | -6.0                   | 3.416                                  | 5.155     |
| 19    |                                                                                                 | $\kappa$ -OR<br>(PDB ID: 4DJH) | S1                  | -7.8                   | 0.000                                  | 0.000     |
| 20    |                                                                                                 |                                | S2                  | -7.8                   | 3.145                                  | 4.663     |
| 21    |                                                                                                 |                                | S3                  | -7.8                   | 11.398                                 | 12.939    |
| 22    |                                                                                                 |                                | S4                  | -7.8                   | 2.638                                  | 4.239     |
| 23    |                                                                                                 |                                | S5                  | -7.6                   | 2.110                                  | 2.888     |
| 24    |                                                                                                 |                                | S6                  | -7.6                   | 1.824                                  | 3.964     |
| 25    |                                                                                                 |                                | S7                  | -7.5                   | 1.516                                  | 2.032     |
| 26    |                                                                                                 |                                | S8                  | -7.4                   | 10.564                                 | 12.414    |
| 27    |                                                                                                 |                                | S9                  | -7.0                   | 3.386                                  | 5.235     |
| 28    | <br>Fentanyl | $\mu$ -OR<br>(PDB ID: 4DKL)    | S1                  | -8.4                   | 0.000                                  | 0.000     |
| 29    |                                                                                                 |                                | S2                  | -8.4                   | 0.062                                  | 1.510     |
| 30    |                                                                                                 |                                | S3                  | -8.3                   | 0.081                                  | 1.510     |
| 31    |                                                                                                 |                                | S4                  | -8.3                   | 0.142                                  | 1.076     |
| 32    |                                                                                                 |                                | S5                  | -8.1                   | 1.673                                  | 7.375     |
| 33    |                                                                                                 |                                | S6                  | -8.1                   | 1.691                                  | 7.473     |
| 34    |                                                                                                 |                                | S7                  | -7.8                   | 2.203                                  | 8.255     |
| 35    |                                                                                                 |                                | S8                  | -7.5                   | 3.108                                  | 4.614     |
| 36    |                                                                                                 |                                | S9                  | -7.5                   | 1.260                                  | 1.769     |
| 37    |                                                                                                 | $\delta$ -OR<br>(PDB ID: 4EJ4) | S1                  | -7.0                   | 0.000                                  | 0.000     |
| 38    |                                                                                                 |                                | S2                  | -6.9                   | 3.035                                  | 5.002     |
| 39    |                                                                                                 |                                | S3                  | -6.8                   | 14.751                                 | 16.236    |
| 40    |                                                                                                 |                                | S4                  | -6.8                   | 2.156                                  | 3.990     |
| 41    |                                                                                                 |                                | S5                  | -6.8                   | 1.602                                  | 2.427     |
| 42    |                                                                                                 |                                | S6                  | -6.8                   | 2.894                                  | 8.772     |
| 43    |                                                                                                 |                                | S7                  | -6.7                   | 2.248                                  | 9.467     |
| 44    |                                                                                                 |                                | S8                  | -6.7                   | 2.221                                  | 3.584     |
| 45    |                                                                                                 |                                | S9                  | -6.7                   | 2.409                                  | 3.288     |
| 46    |                                                                                                 | $\kappa$ -OR<br>(PDB ID: 4DJH) | S1                  | -7.7                   | 0.000                                  | 0.000     |
| 47    |                                                                                                 |                                | S2                  | -7.7                   | 11.001                                 | 12.666    |
| 48    |                                                                                                 |                                | S3                  | -7.6                   | 12.524                                 | 15.704    |
| 49    |                                                                                                 |                                | S4                  | -7.6                   | 0.223                                  | 1.520     |
| 50    |                                                                                                 |                                | S5                  | -7.5                   | 12.552                                 | 15.802    |
| 51    |                                                                                                 |                                | S6                  | -7.3                   | 4.340                                  | 8.252     |
| 52    |                                                                                                 |                                | S7                  | -7.3                   | 11.202                                 | 14.990    |
| 53    |                                                                                                 |                                | S8                  | -7.3                   | 4.132                                  | 8.022     |
| 54    |                                                                                                 |                                | S9                  | -7.3                   | 13.137                                 | 16.068    |

[a] The pose S1 represents the lowest value of  $\Delta G_{\text{calc}}$  (kcal/mol), which means that ligand-binding affinity to receptor is the highest, and in contrary, the S9 mode represent the lowest ligand-binding affinity.

[b] The values <2.000 rmsd represent the closest distance between the ligand and the opioid receptor binding site.

**Table S5. Docking scoring of the respective ligands complexed with opioid receptors (ORs) – continued.**

| Entry | Ligand | OR                             | Pose <sup>[a]</sup> | Affinity<br>(kcal/mol) | Distance from best mode <sup>[b]</sup> |           |
|-------|--------|--------------------------------|---------------------|------------------------|----------------------------------------|-----------|
|       |        |                                |                     |                        | rmsd l.b.                              | rmsd u.b. |
| 55    |        | $\mu$ -OR<br>(PDB ID: 4DKL)    | S1                  | -9.3                   | 0.000                                  | 0.000     |
| 56    |        |                                | S2                  | -8.6                   | 1.192                                  | 1.574     |
| 57    |        |                                | S3                  | -8.6                   | 2.731                                  | 3.870     |
| 58    |        |                                | S4                  | -8.5                   | 1.368                                  | 1.562     |
| 59    |        |                                | S5                  | -8.1                   | 2.264                                  | 3.451     |
| 60    |        |                                | S6                  | -7.9                   | 3.486                                  | 7.660     |
| 61    |        |                                | S7                  | -7.8                   | 1.808                                  | 2.161     |
| 62    |        |                                | S8                  | -7.8                   | 3.288                                  | 6.639     |
| 63    |        |                                | S9                  | -7.8                   | 2.963                                  | 3.857     |
| 64    |        | $\delta$ -OR<br>(PDB ID: 4EJ4) | S1                  | -9.1                   | 0.000                                  | 0.000     |
| 65    |        |                                | S2                  | -8.8                   | 1.155                                  | 1.388     |
| 66    |        |                                | S3                  | -8.8                   | 2.185                                  | 3.462     |
| 67    |        |                                | S4                  | -8.6                   | 1.678                                  | 2.752     |
| 68    |        |                                | S5                  | -8.6                   | 2.685                                  | 3.212     |
| 69    |        |                                | S6                  | -7.7                   | 1.899                                  | 3.232     |
| 70    |        |                                | S7                  | -7.6                   | 2.481                                  | 4.227     |
| 71    |        |                                | S8                  | -7.4                   | 14.717                                 | 17.865    |
| 72    |        |                                | S9                  | -7.3                   | 15.226                                 | 18.108    |
| 73    |        | $\kappa$ -OR<br>(PDB ID: 4DJH) | S1                  | -7.9                   | 0.000                                  | 0.000     |
| 74    |        |                                | S2                  | -7.9                   | 3.539                                  | 7.041     |
| 75    |        |                                | S3                  | -7.9                   | 13.462                                 | 16.581    |
| 76    |        |                                | S4                  | -7.9                   | 7.479                                  | 10.610    |
| 77    |        |                                | S5                  | -7.9                   | 16.239                                 | 19.390    |
| 78    |        |                                | S6                  | -7.9                   | 3.626                                  | 7.199     |
| 79    |        |                                | S7                  | -7.8                   | 14.123                                 | 16.680    |
| 80    |        |                                | S8                  | -7.7                   | 13.193                                 | 16.407    |
| 81    |        |                                | S9                  | -7.7                   | 1.413                                  | 1.797     |
| 82    |        | $\mu$ -OR<br>(PDB ID: 4DKL)    | S1                  | -9.2                   | 0.000                                  | 0.000     |
| 83    |        |                                | S2                  | -9.2                   | 2.075                                  | 10.006    |
| 84    |        |                                | S3                  | -9.1                   | 2.934                                  | 10.105    |
| 85    |        |                                | S4                  | -8.9                   | 3.228                                  | 4.971     |
| 86    |        |                                | S5                  | -8.9                   | 2.877                                  | 4.179     |
| 87    |        |                                | S6                  | -8.8                   | 5.779                                  | 10.009    |
| 88    |        |                                | S7                  | -8.8                   | 2.862                                  | 3.947     |
| 89    |        |                                | S8                  | -8.7                   | 2.939                                  | 10.007    |
| 90    |        |                                | S9                  | -8.6                   | 4.945                                  | 9.454     |
| 91    |        | $\delta$ -OR<br>(PDB ID: 4EJ4) | S1                  | -8.7                   | 0.000                                  | 0.000     |
| 92    |        |                                | S2                  | -8.6                   | 3.481                                  | 8.576     |
| 93    |        |                                | S3                  | -8.4                   | 3.717                                  | 6.056     |
| 94    |        |                                | S4                  | -8.3                   | 4.658                                  | 5.353     |
| 95    |        |                                | S5                  | -8.2                   | 4.137                                  | 8.592     |
| 96    |        |                                | S6                  | -8.2                   | 4.434                                  | 9.199     |
| 97    |        |                                | S7                  | -8.1                   | 11.821                                 | 16.216    |
| 98    |        |                                | S8                  | -8.0                   | 10.812                                 | 13.721    |
| 99    |        |                                | S9                  | -8.0                   | 4.637                                  | 5.631     |
| 100   |        | $\kappa$ -OR<br>(PDB ID: 4DJH) | S1                  | -9.6                   | 0.000                                  | 0.000     |
| 101   |        |                                | S2                  | -9.2                   | 3.905                                  | 7.474     |
| 102   |        |                                | S3                  | -9.0                   | 1.990                                  | 2.768     |
| 103   |        |                                | S4                  | -9.0                   | 4.308                                  | 7.534     |
| 104   |        |                                | S5                  | -8.8                   | 3.909                                  | 6.425     |
| 105   |        |                                | S6                  | -8.8                   | 11.291                                 | 14.030    |
| 106   |        |                                | S7                  | -8.8                   | 3.722                                  | 5.290     |
| 107   |        |                                | S8                  | -8.7                   | 4.169                                  | 6.220     |
| 108   |        |                                | S9                  | -8.7                   | 4.369                                  | 7.899     |

[a] The pose S1 represents the lowest value of  $\Delta G_{\text{calc}}$  (kcal/mol), which means that ligand-binding affinity to receptor is the highest, and in contrary, the S9 mode represent the lowest ligand-binding affinity.

[b] The values <2.000 rmsd represent the closest distance between the ligand and the opioid receptor binding site.

**Table S5. Docking scoring of the respective ligands complexed with opioid receptors (ORs) – continued.**

| Entry | Ligand                                                                              | OR                             | Pose <sup>[a]</sup> | Affinity<br>(kcal/mol) | Distance from best mode <sup>[b]</sup> |           |
|-------|-------------------------------------------------------------------------------------|--------------------------------|---------------------|------------------------|----------------------------------------|-----------|
|       |                                                                                     |                                |                     |                        | rmsd l.b.                              | rmsd u.b. |
| 109   | 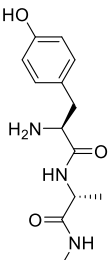   | $\mu$ -OR<br>(PDB ID: 4DKL)    | S1                  | -9.3                   | 0.000                                  | 0.000     |
| 110   |                                                                                     |                                | S2                  | -9.3                   | 2.443                                  | 5.912     |
| 111   |                                                                                     |                                | S3                  | -9.2                   | 2.533                                  | 8.272     |
| 112   |                                                                                     |                                | S4                  | -9.2                   | 2.641                                  | 7.153     |
| 113   |                                                                                     |                                | S5                  | -9.1                   | 2.229                                  | 7.540     |
| 114   |                                                                                     |                                | S6                  | -9.0                   | 2.367                                  | 4.987     |
| 115   |                                                                                     |                                | S7                  | -9.0                   | 2.183                                  | 6.312     |
| 116   |                                                                                     |                                | S8                  | -8.9                   | 2.653                                  | 6.808     |
| 117   |                                                                                     |                                | S9                  | -8.9                   | 2.708                                  | 6.123     |
| 118   |    | $\delta$ -OR<br>(PDB ID: 4EJ4) | S1                  | -9.9                   | 0.000                                  | 0.000     |
| 119   |                                                                                     |                                | S2                  | -9.6                   | 3.459                                  | 5.022     |
| 120   |                                                                                     |                                | S3                  | -9.5                   | 3.034                                  | 12.152    |
| 121   |                                                                                     |                                | S4                  | -9.5                   | 2.363                                  | 4.021     |
| 122   |                                                                                     |                                | S5                  | -9.4                   | 1.626                                  | 2.563     |
| 123   |                                                                                     |                                | S6                  | -9.3                   | 1.822                                  | 14.672    |
| 124   |                                                                                     |                                | S7                  | -9.3                   | 2.252                                  | 3.463     |
| 125   |                                                                                     |                                | S8                  | -9.2                   | 5.071                                  | 8.288     |
| 126   |                                                                                     |                                | S9                  | -9.2                   | 3.160                                  | 5.744     |
| 127   |  | $\kappa$ -OR<br>(PDB ID: 4DJH) | S1                  | -9.6                   | 0.000                                  | 0.000     |
| 128   |                                                                                     |                                | S2                  | -9.6                   | 2.070                                  | 7.564     |
| 129   |                                                                                     |                                | S3                  | -9.5                   | 2.074                                  | 8.131     |
| 130   |                                                                                     |                                | S4                  | -9.2                   | 2.168                                  | 7.994     |
| 131   |                                                                                     |                                | S5                  | -9.0                   | 2.156                                  | 7.687     |
| 132   |                                                                                     |                                | S6                  | -8.9                   | 1.637                                  | 2.271     |
| 133   |                                                                                     |                                | S7                  | -8.9                   | 2.058                                  | 8.762     |
| 134   |                                                                                     |                                | S8                  | -8.9                   | 2.345                                  | 6.662     |
| 135   |                                                                                     |                                | S9                  | -8.8                   | 2.307                                  | 9.438     |
| 136   |  | $\mu$ -OR<br>(PDB ID: 4DKL)    | S1                  | -8.0                   | 0.000                                  | 0.000     |
| 137   |                                                                                     |                                | S2                  | -7.8                   | 1.461                                  | 4.753     |
| 138   |                                                                                     |                                | S3                  | -7.7                   | 1.695                                  | 4.147     |
| 139   |                                                                                     |                                | S4                  | -7.7                   | 2.330                                  | 5.998     |
| 140   |                                                                                     |                                | S5                  | -7.6                   | 2.177                                  | 5.119     |
| 141   |                                                                                     |                                | S6                  | -7.5                   | 1.580                                  | 2.295     |
| 142   |                                                                                     |                                | S7                  | -7.5                   | 5.479                                  | 8.762     |
| 143   |                                                                                     |                                | S8                  | -7.5                   | 1.816                                  | 6.490     |
| 144   |                                                                                     |                                | S9                  | -7.4                   | 3.921                                  | 6.438     |
| 145   |  | $\delta$ -OR<br>(PDB ID: 4EJ4) | S1                  | -8.0                   | 0.000                                  | 0.000     |
| 146   |                                                                                     |                                | S2                  | -7.8                   | 2.128                                  | 6.156     |
| 147   |                                                                                     |                                | S3                  | -7.3                   | 1.561                                  | 2.200     |
| 148   |                                                                                     |                                | S4                  | -7.3                   | 2.018                                  | 5.746     |
| 149   |                                                                                     |                                | S5                  | -7.3                   | 1.745                                  | 4.636     |
| 150   |                                                                                     |                                | S6                  | -7.2                   | 2.038                                  | 5.665     |
| 151   |                                                                                     |                                | S7                  | -7.2                   | 1.823                                  | 5.618     |
| 152   |                                                                                     |                                | S8                  | -7.2                   | 1.921                                  | 4.642     |
| 153   |                                                                                     |                                | S9                  | -7.2                   | 2.032                                  | 5.358     |
| 154   |  | $\kappa$ -OR<br>(PDB ID: 4DJH) | S1                  | -7.8                   | 0.000                                  | 0.000     |
| 155   |                                                                                     |                                | S2                  | -7.8                   | 11.083                                 | 13.749    |
| 156   |                                                                                     |                                | S3                  | -7.8                   | 1.632                                  | 4.633     |
| 157   |                                                                                     |                                | S4                  | -7.7                   | 1.728                                  | 2.729     |
| 158   |                                                                                     |                                | S5                  | -7.7                   | 1.910                                  | 4.492     |
| 159   |                                                                                     |                                | S6                  | -7.7                   | 10.839                                 | 13.325    |
| 160   |                                                                                     |                                | S7                  | -7.6                   | 3.406                                  | 7.119     |
| 161   |                                                                                     |                                | S8                  | -7.6                   | 1.643                                  | 4.711     |
| 162   |                                                                                     |                                | S9                  | -7.6                   | 11.332                                 | 14.262    |

[a] The pose S1 represents the lowest value of  $\Delta G_{\text{calc}}$  (kcal/mol), which means that ligand-binding affinity to receptor is the highest, and in contrary, the S9 mode represent the lowest ligand-binding affinity.

[b] The values <2.000 rmsd represent the closest distance between the ligand and the opioid receptor binding site.

**Table S5. Docking scoring of the respective ligands complexed with opioid receptors (ORs) – continued.**

| Entry | Ligand                                                                              | OR                             | Pose <sup>[a]</sup> | Affinity<br>(kcal/mol) | Distance from best mode <sup>[b]</sup> |           |
|-------|-------------------------------------------------------------------------------------|--------------------------------|---------------------|------------------------|----------------------------------------|-----------|
|       |                                                                                     |                                |                     |                        | rmsd l.b.                              | rmsd u.b. |
| 163   | 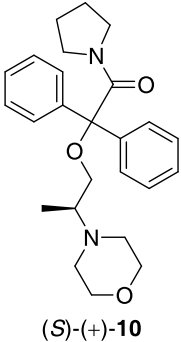   | $\mu$ -OR<br>(PDB ID: 4DKL)    | S1                  | -7.8                   | 0.000                                  | 0.000     |
| 164   |                                                                                     |                                | S2                  | -7.7                   | 1.553                                  | 4.319     |
| 165   |                                                                                     |                                | S3                  | -7.7                   | 1.543                                  | 2.597     |
| 166   |                                                                                     |                                | S4                  | -7.7                   | 1.953                                  | 4.992     |
| 167   |                                                                                     |                                | S5                  | -7.6                   | 2.011                                  | 4.739     |
| 168   |                                                                                     |                                | S6                  | -7.6                   | 2.036                                  | 4.956     |
| 169   |                                                                                     |                                | S7                  | -7.5                   | 2.313                                  | 5.442     |
| 170   |                                                                                     |                                | S8                  | -7.5                   | 5.419                                  | 8.322     |
| 171   |                                                                                     |                                | S9                  | -7.5                   | 1.832                                  | 4.660     |
| 172   |                                                                                     | $\delta$ -OR<br>(PDB ID: 4EJ4) | S1                  | -7.6                   | 0.000                                  | 0.000     |
| 173   |                                                                                     |                                | S2                  | -7.6                   | 1.411                                  | 2.113     |
| 174   |                                                                                     |                                | S3                  | -7.5                   | 1.531                                  | 2.193     |
| 175   |                                                                                     |                                | S4                  | -7.4                   | 1.299                                  | 4.468     |
| 176   |                                                                                     |                                | S5                  | -7.4                   | 1.637                                  | 2.355     |
| 177   |                                                                                     |                                | S6                  | -7.4                   | 1.829                                  | 4.822     |
| 178   |                                                                                     |                                | S7                  | -7.4                   | 1.816                                  | 4.790     |
| 179   |                                                                                     |                                | S8                  | -7.3                   | 1.811                                  | 4.398     |
| 180   |                                                                                     |                                | S9                  | -7.2                   | 1.533                                  | 2.076     |
| 181   |  | $\kappa$ -OR<br>(PDB ID: 4DJH) | S1                  | -7.7                   | 0.000                                  | 0.000     |
| 182   |                                                                                     |                                | S2                  | -7.7                   | 1.147                                  | 1.947     |
| 183   |                                                                                     |                                | S3                  | -7.7                   | 10.819                                 | 12.732    |
| 184   |                                                                                     |                                | S4                  | -7.7                   | 1.360                                  | 4.496     |
| 185   |                                                                                     |                                | S5                  | -7.7                   | 11.720                                 | 14.686    |
| 186   |                                                                                     |                                | S6                  | -7.6                   | 12.036                                 | 14.375    |
| 187   |                                                                                     |                                | S7                  | -7.6                   | 1.981                                  | 3.482     |
| 188   |                                                                                     |                                | S8                  | -7.4                   | 12.248                                 | 14.632    |
| 189   |                                                                                     |                                | S9                  | -7.4                   | 11.912                                 | 14.636    |
| 190   |                                                                                     | $\mu$ -OR<br>(PDB ID: 4DKL)    | S1                  | -8.1                   | 0.000                                  | 0.000     |
| 191   |                                                                                     |                                | S2                  | -7.8                   | 1.411                                  | 4.303     |
| 192   |                                                                                     |                                | S3                  | -7.7                   | 2.084                                  | 4.910     |
| 193   |                                                                                     |                                | S4                  | -7.7                   | 1.393                                  | 1.982     |
| 194   |                                                                                     |                                | S5                  | -7.6                   | 1.553                                  | 4.359     |
| 195   |                                                                                     |                                | S6                  | -7.6                   | 1.915                                  | 4.698     |
| 196   |                                                                                     |                                | S7                  | -7.6                   | 1.508                                  | 4.437     |
| 197   |                                                                                     |                                | S8                  | -7.6                   | 1.856                                  | 4.381     |
| 198   |                                                                                     |                                | S9                  | -7.4                   | 2.197                                  | 5.312     |
| 199   |                                                                                     | $\delta$ -OR<br>(PDB ID: 4EJ4) | S1                  | -8.3                   | 0.000                                  | 0.000     |
| 200   |                                                                                     |                                | S2                  | -8.1                   | 2.388                                  | 5.043     |
| 201   |                                                                                     |                                | S3                  | -8.0                   | 2.173                                  | 4.981     |
| 202   |                                                                                     |                                | S4                  | -7.9                   | 2.107                                  | 4.966     |
| 203   |                                                                                     |                                | S5                  | -7.9                   | 2.413                                  | 5.153     |
| 204   |                                                                                     |                                | S6                  | -7.8                   | 2.303                                  | 5.990     |
| 205   |                                                                                     |                                | S7                  | -7.8                   | 1.683                                  | 2.551     |
| 206   |                                                                                     |                                | S8                  | -7.7                   | 2.156                                  | 3.143     |
| 207   |                                                                                     |                                | S9                  | -7.7                   | 2.326                                  | 5.235     |
| 208   |  | $\kappa$ -OR<br>(PDB ID: 4DJH) | S1                  | -8.8                   | 0.000                                  | 0.000     |
| 209   |                                                                                     |                                | S2                  | -8.8                   | 10.483                                 | 12.202    |
| 210   |                                                                                     |                                | S3                  | -8.8                   | 10.190                                 | 12.758    |
| 211   |                                                                                     |                                | S4                  | -8.7                   | 10.406                                 | 12.386    |
| 212   |                                                                                     |                                | S5                  | -8.7                   | 1.382                                  | 4.591     |
| 213   |                                                                                     |                                | S6                  | -8.6                   | 11.920                                 | 14.495    |
| 214   |                                                                                     |                                | S7                  | -8.5                   | 12.094                                 | 14.633    |
| 215   |                                                                                     |                                | S8                  | -8.5                   | 2.035                                  | 6.436     |
| 216   |                                                                                     |                                | S9                  | -8.5                   | 1.776                                  | 2.540     |

[a] The pose S1 represents the lowest value of  $\Delta G_{\text{calc}}$  (kcal/mol), which means that ligand-binding affinity to receptor is the highest, and in contrary, the S9 mode represent the lowest ligand-binding affinity.

[b] The values <2.000 rmsd represent the closest distance between the ligand and the opioid receptor binding site.



**Table S6. Crystal data and structure refinement parameters for (*R*)-(-)-10.**

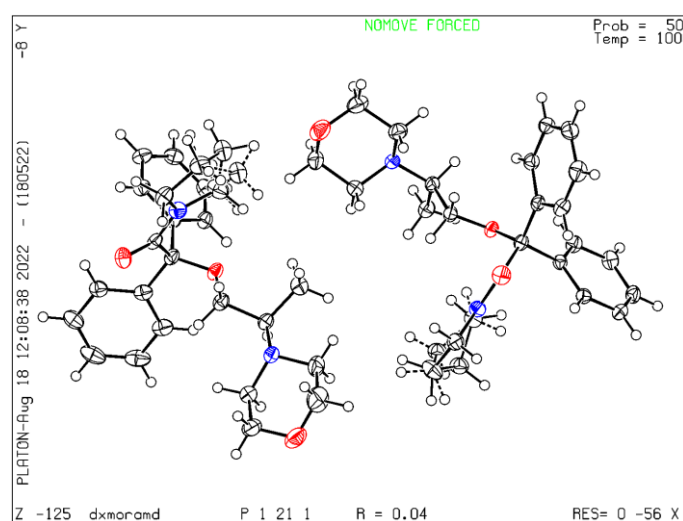

| Compound                                                                     | ( <i>R</i> )-(-)-10                                           |
|------------------------------------------------------------------------------|---------------------------------------------------------------|
| Chemical formula                                                             | C <sub>25</sub> H <sub>32</sub> N <sub>2</sub> O <sub>3</sub> |
| <i>M</i> /g·mol <sup>-1</sup>                                                | 408.52                                                        |
| <i>T</i> /K                                                                  | 100.0(1)                                                      |
| Crystal system                                                               | monoclinic                                                    |
| Space group                                                                  | <i>P</i> 2 <sub>1</sub>                                       |
| <i>a</i> /Å                                                                  | 11.4651(1)                                                    |
| <i>b</i> /Å                                                                  | 9.1043(1)                                                     |
| <i>c</i> /Å                                                                  | 21.3925(2)                                                    |
| $\beta$ /°                                                                   | 98.324(1)                                                     |
| <i>V</i> /Å <sup>3</sup>                                                     | 2209.46(4)                                                    |
| <i>Z</i>                                                                     | 4                                                             |
| <i>D</i> <sub>calc</sub> /g·cm <sup>-3</sup>                                 | 1.228                                                         |
| $\mu$ /mm <sup>-1</sup>                                                      | 0.638                                                         |
| <i>F</i> (000)                                                               | 880.0                                                         |
| Crystal size/mm <sup>3</sup>                                                 | 0.67 × 0.42 × 0.251                                           |
| Radiation, $\lambda$ / Å                                                     | CuK $\alpha$ ( $\lambda$ = 1.54184)                           |
| 2 $\theta$ Range /°                                                          | 7.794 to 134.06                                               |
| Reflections collected                                                        | 93508                                                         |
| Independent reflections                                                      | 7903                                                          |
| <i>R</i> <sub>int</sub>                                                      | 0.0550                                                        |
| Data/restraints/parameters                                                   | 7903/5/552                                                    |
| <i>S</i> ( <i>F</i> <sup>2</sup> ) <sup>[a]</sup>                            | 1.030                                                         |
| <i>R</i> 1, <i>wR</i> 2 ( <i>I</i> > 2 $\sigma$ ( <i>I</i> )) <sup>[b]</sup> | 0.0354, 0.0923                                                |
| <i>R</i> 1, <i>wR</i> 2 (all data)                                           | 0.0361, 0.0929                                                |
| $\Delta\rho_{\text{min/max}}$ /eÅ <sup>-3</sup>                              | +0.46/−0.26                                                   |
| Flack parameter                                                              | 0.01(6)                                                       |

[a] Goodness-of-fit  $S = \{\sum[w(F_o^2 - F_c^2)^2]/(n-p)\}^{1/2}$  where *n* is the reflections number and *p* is the parameters number.

[b]  $R1 = \sum||F_o| - |F_c||/\sum|F_o|$ ,  $wR2 = \{\sum[w(F_o^2 - F_c^2)^2]/\sum[w(F_o^2)^2]\}^{1/2}$ .

### HPLC of *rac*-3 on Chiralpak AD-H at 30 °C

Conditions: *n*-hexane-EtOH (90:10, v/v); *f*=0.6 mL/min;  $\lambda$ =208 nm

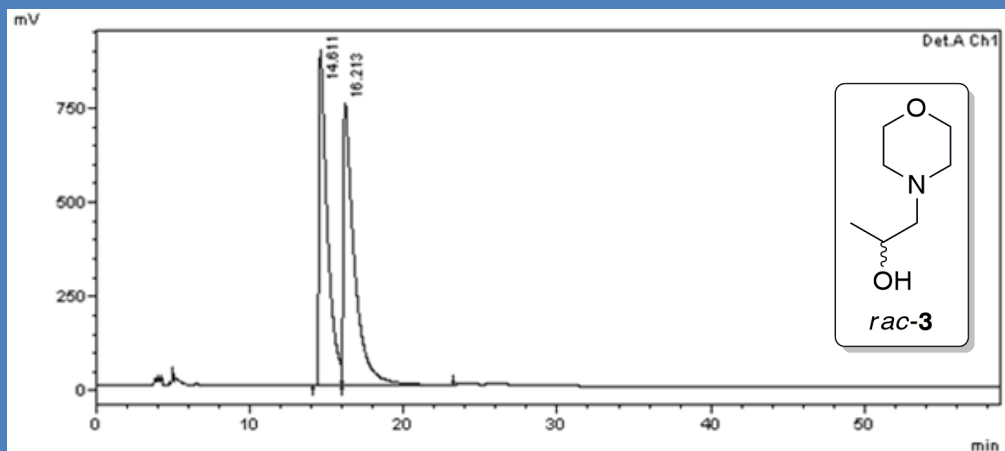

### HPLC of (*S*)-(+)-3 on Chiralpak AD-H at 30 °C

Conditions: *n*-hexane-EtOH (90:10, v/v); *f*=0.6 mL/min;  $\lambda$ =208 nm

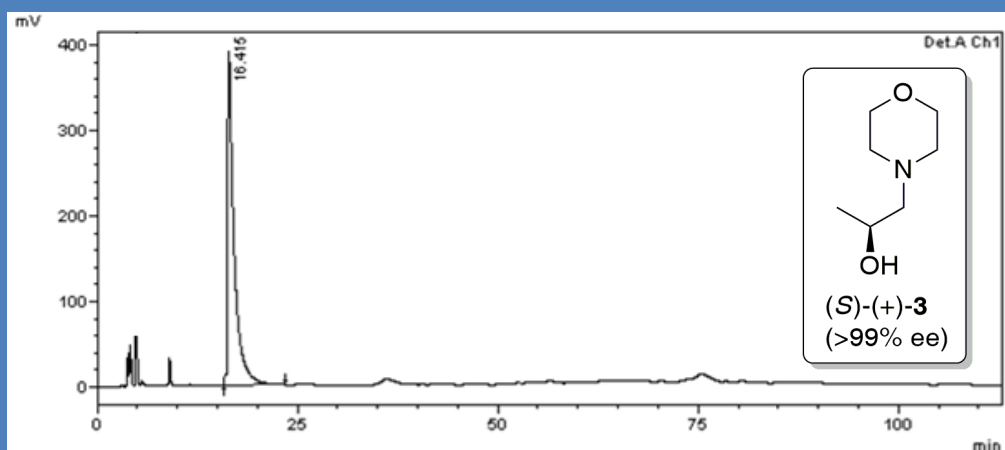

### HPLC of (*R*)-(-)-3 on Chiralpak AD-H at 30 °C

Conditions: *n*-hexane-EtOH (90:10, v/v); *f*=0.6 mL/min;  $\lambda$ =208 nm

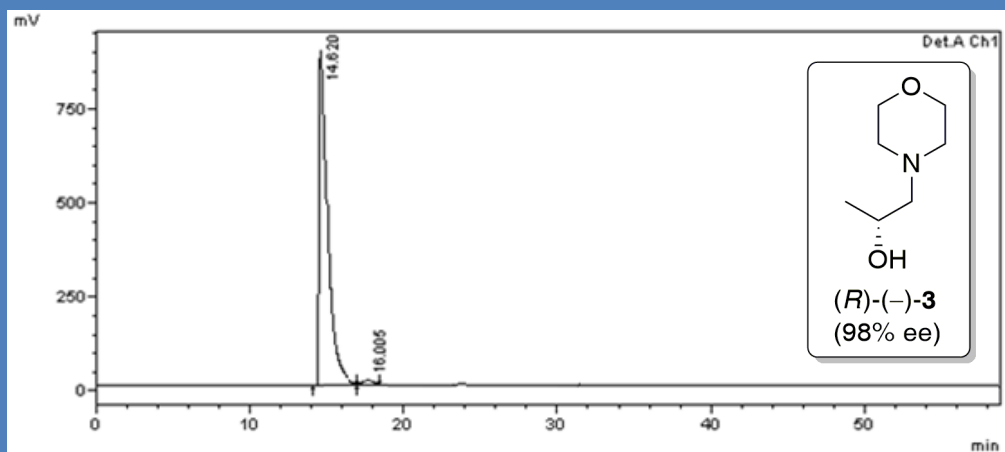

### HPLC of *rac*-5-SPh (obtained from *rac*-5) on Chiralcel OJ-H at 30 °C

Conditions: *n*-hexane/*tert*-ButOH/Et<sub>3</sub>N (96.5:3.0:0.5, v/v/v); *f*=1.0 mL/min;  $\lambda$ =254 nm

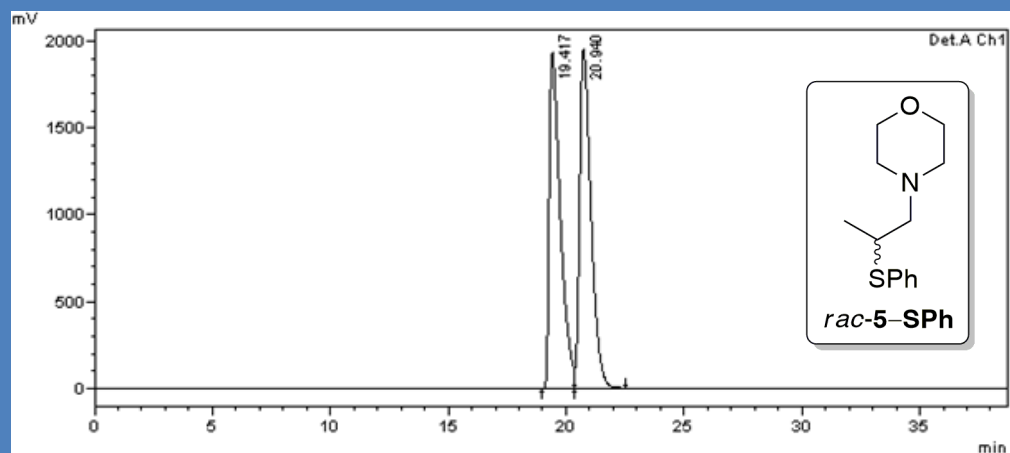

### HPLC of (*S*)-5-SPh [obtained from (*R*)-(-)-5] on Chiralcel OJ-H at 30 °C

Conditions: *n*-hexane/*tert*-ButOH/Et<sub>3</sub>N (96.5:3.0:0.5, v/v/v); *f*=1.0 mL/min;  $\lambda$ =254 nm

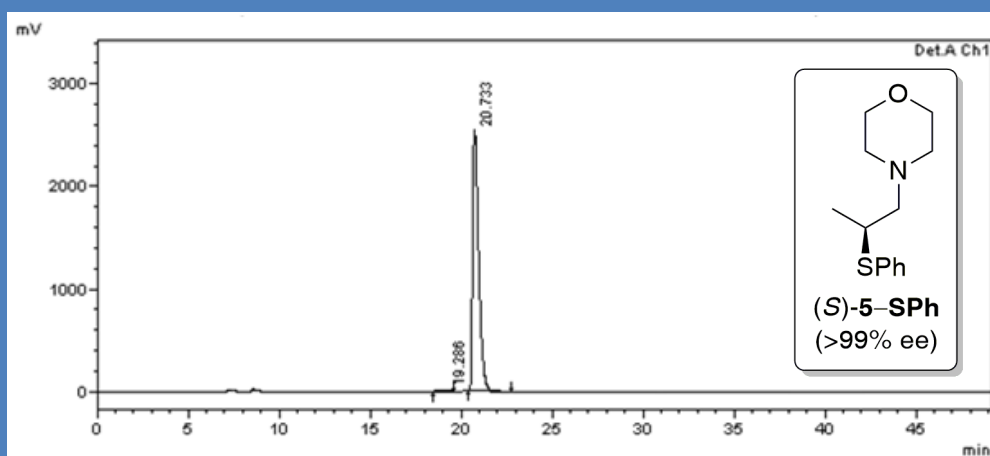

### HPLC of (*R*)-5-SPh [obtained from (*S*)-(+)-5] on Chiralcel OJ-H at 30 °C

Conditions: *n*-hexane/*tert*-ButOH/Et<sub>3</sub>N (96.5:3.0:0.5, v/v/v); *f*=1.0 mL/min;  $\lambda$ =254 nm

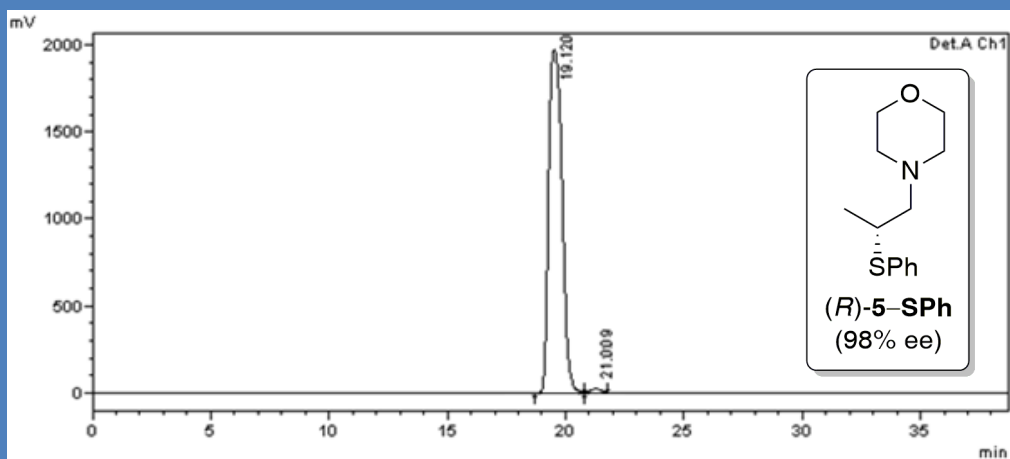

### HPLC of *rac*-10 on Chiralcel OD-H at 30 °C

Conditions: *n*-hexane-2-PrOH (90:10, v/v); f=0.8 mL/min;  $\lambda$ =222 nm

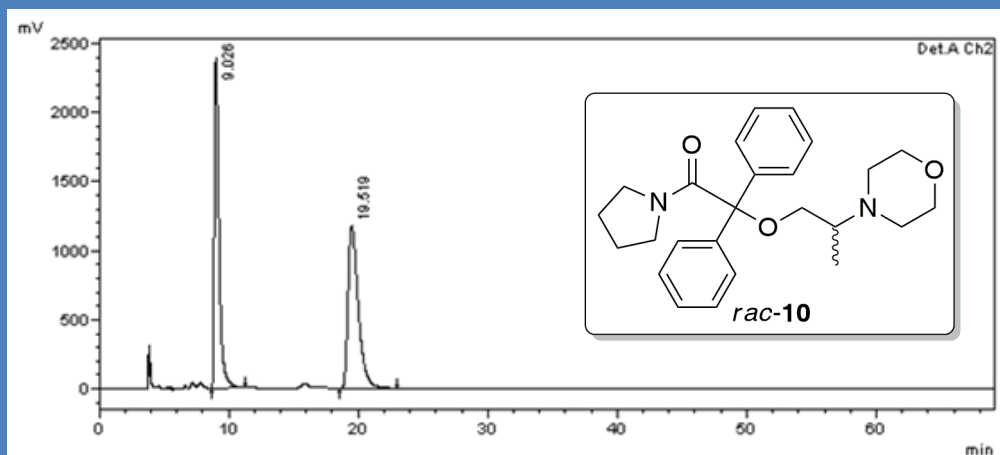

### HPLC of (*S*)-(+)-10 on Chiralcel OD-H at 30 °C

Conditions: *n*-hexane-2-PrOH (90:10, v/v); f=0.8 mL/min;  $\lambda$ =222 nm

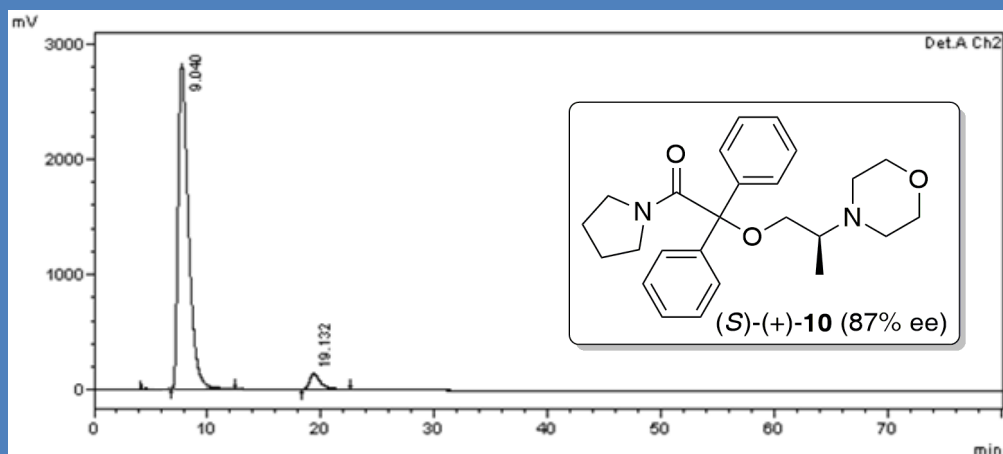

### HPLC of (*R*)-(-)-10 on Chiralcel OD-H at 30 °C

Conditions: *n*-hexane-2-PrOH (90:10, v/v); f=0.8 mL/min;  $\lambda$ =222 nm

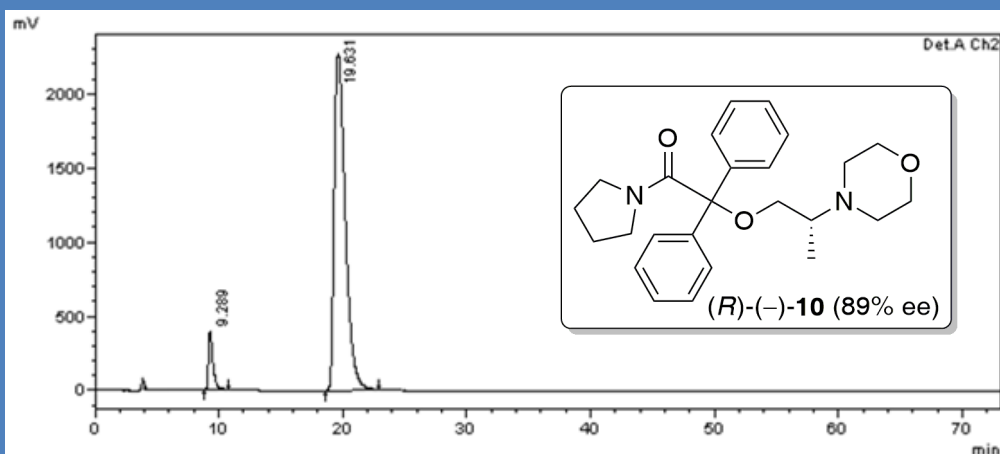

### 1-(Morpholin-4-yl)propan-2-ol (*rac*-**3**)

$^1\text{H}$  NMR spectrum of *rac*-**3** (400 MHz,  $\text{CDCl}_3$ )

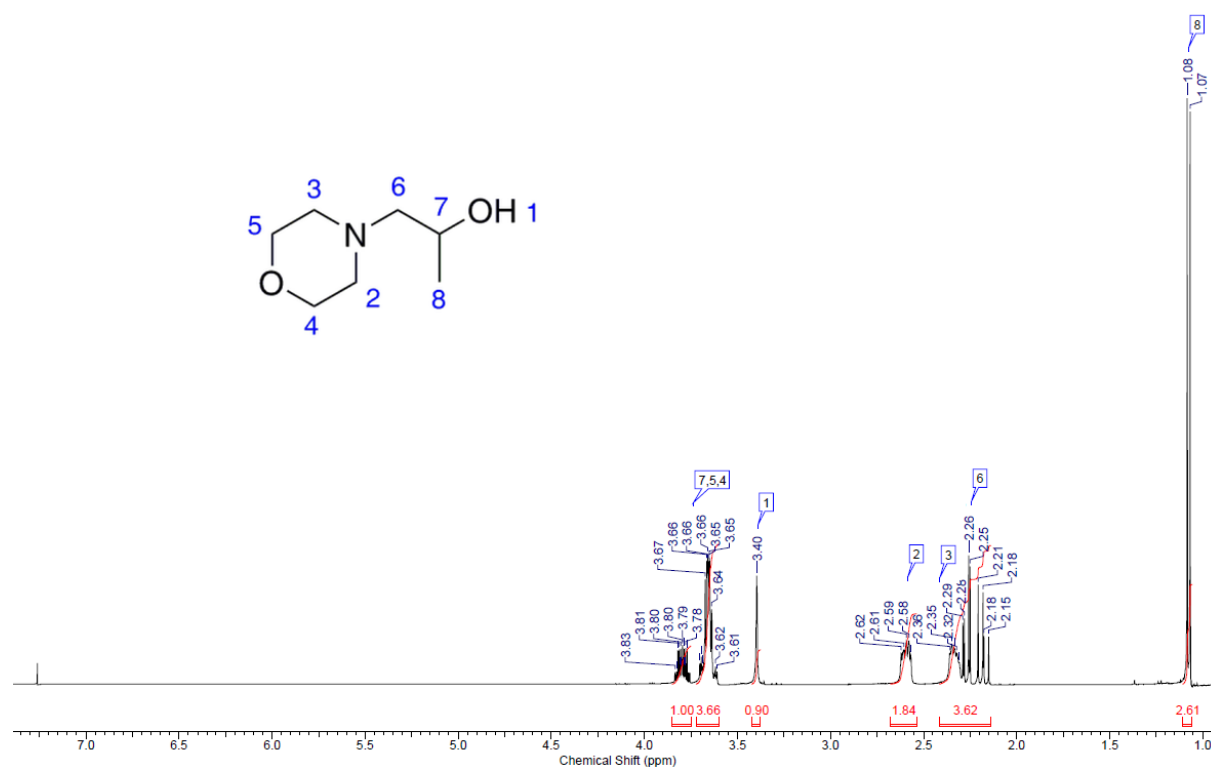

$^{13}\text{C}$  NMR spectrum of *rac*-**3** (100 MHz,  $\text{CDCl}_3$ )

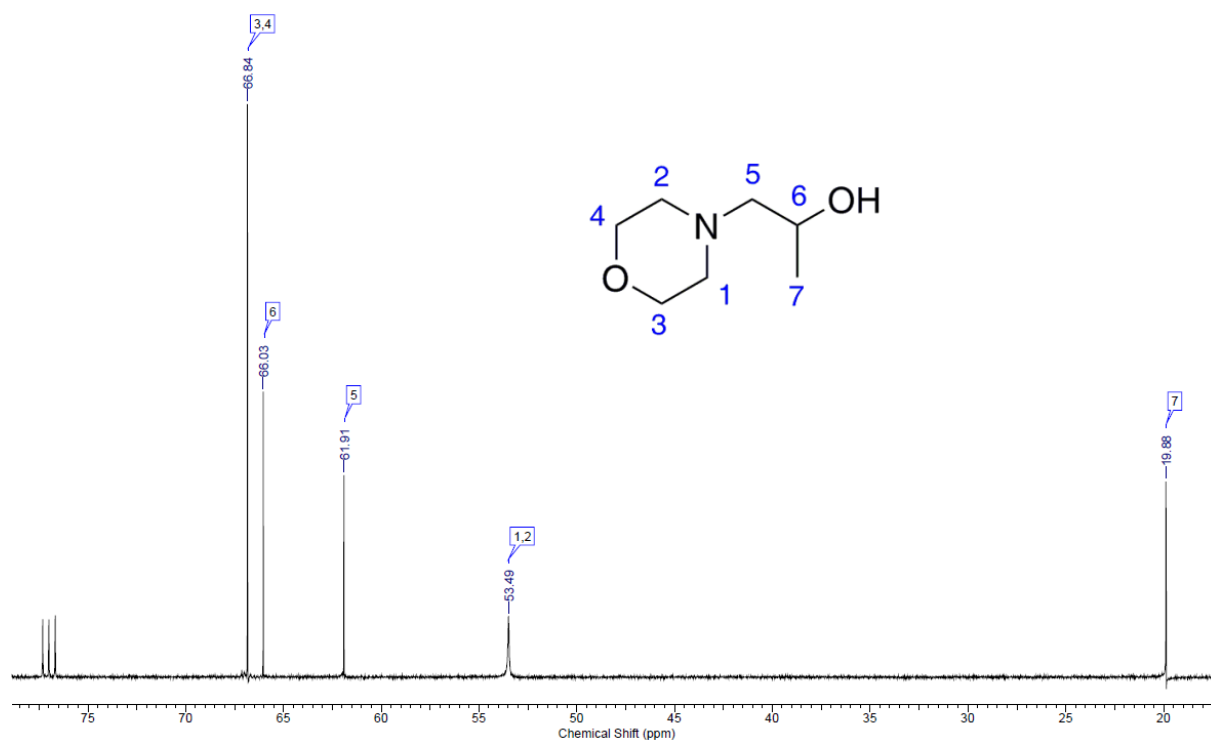

### MS spectrum of *rac*-**3** (ESI-TOF)

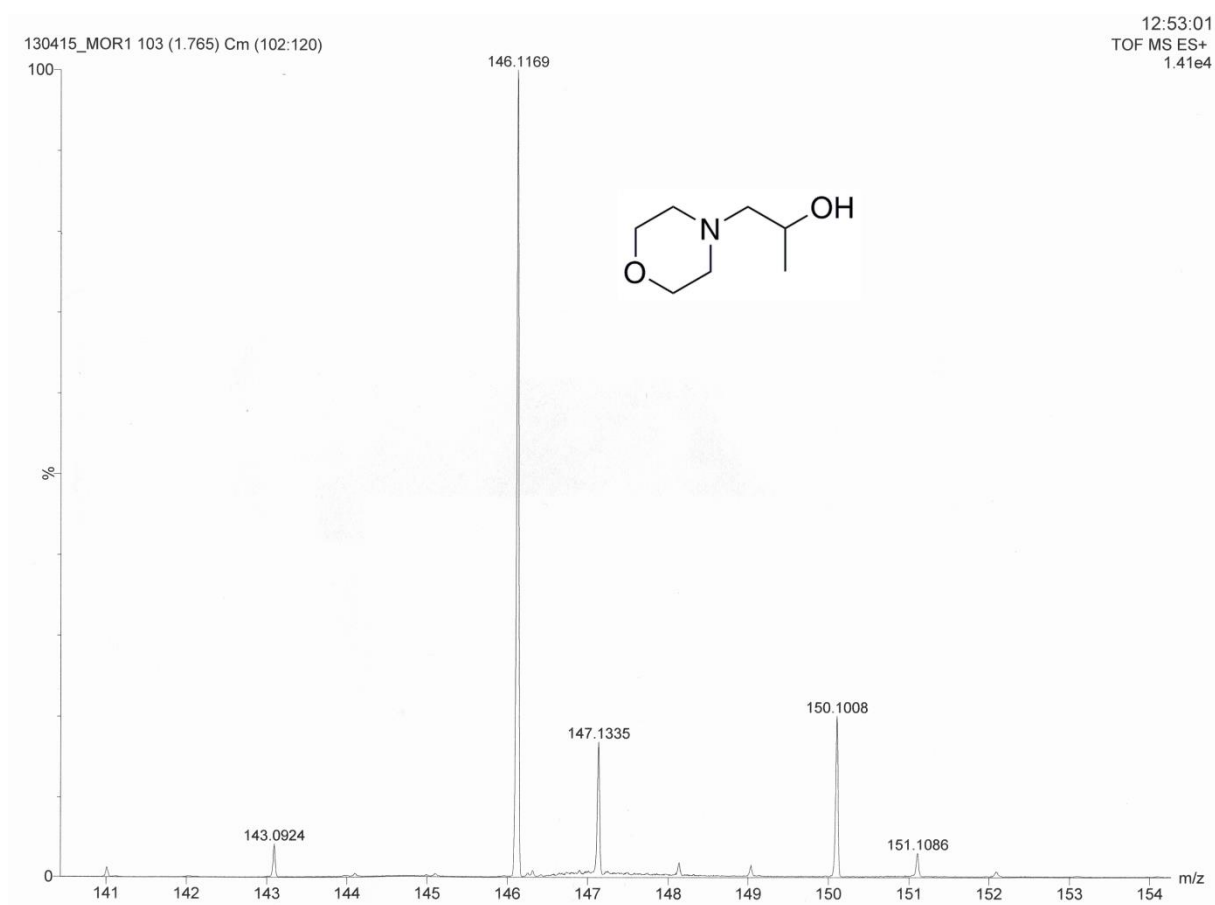

### FT-IR spectrum of *rac*-**3** (neat)

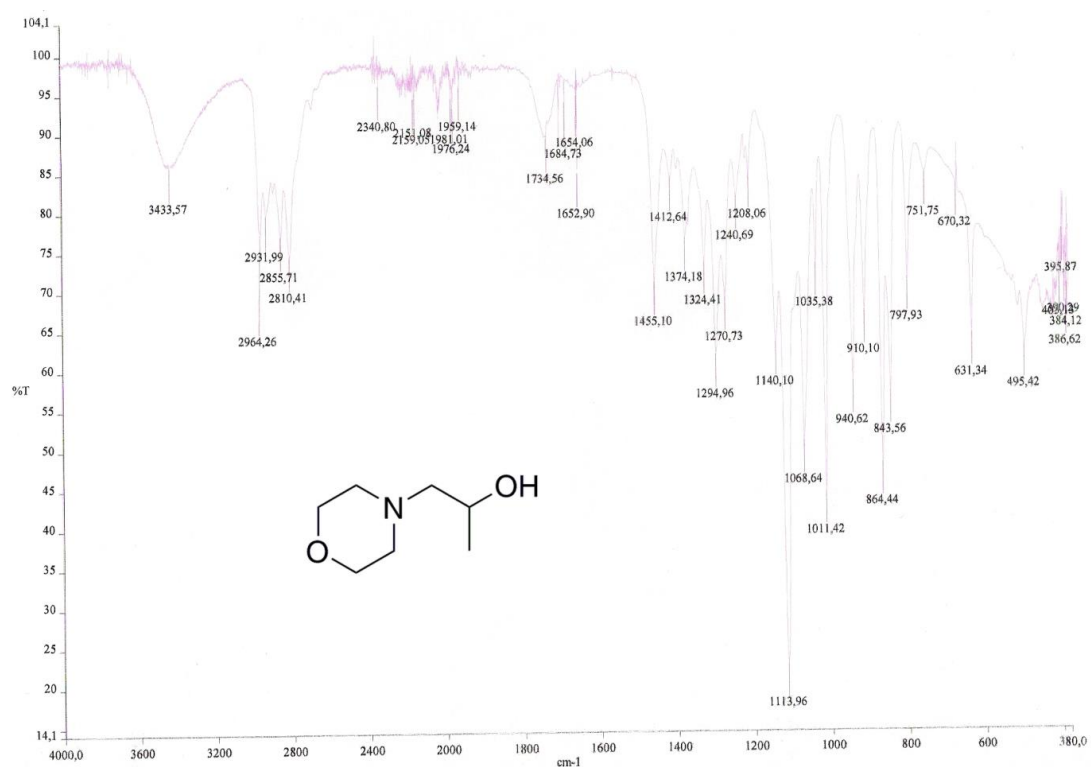

# 1-(Morpholin-4-yl)propan-2-yl acetate (*rac*-**4a**)

$^1\text{H}$  NMR spectrum of *rac*-**4a** (400 MHz,  $\text{CDCl}_3$ )

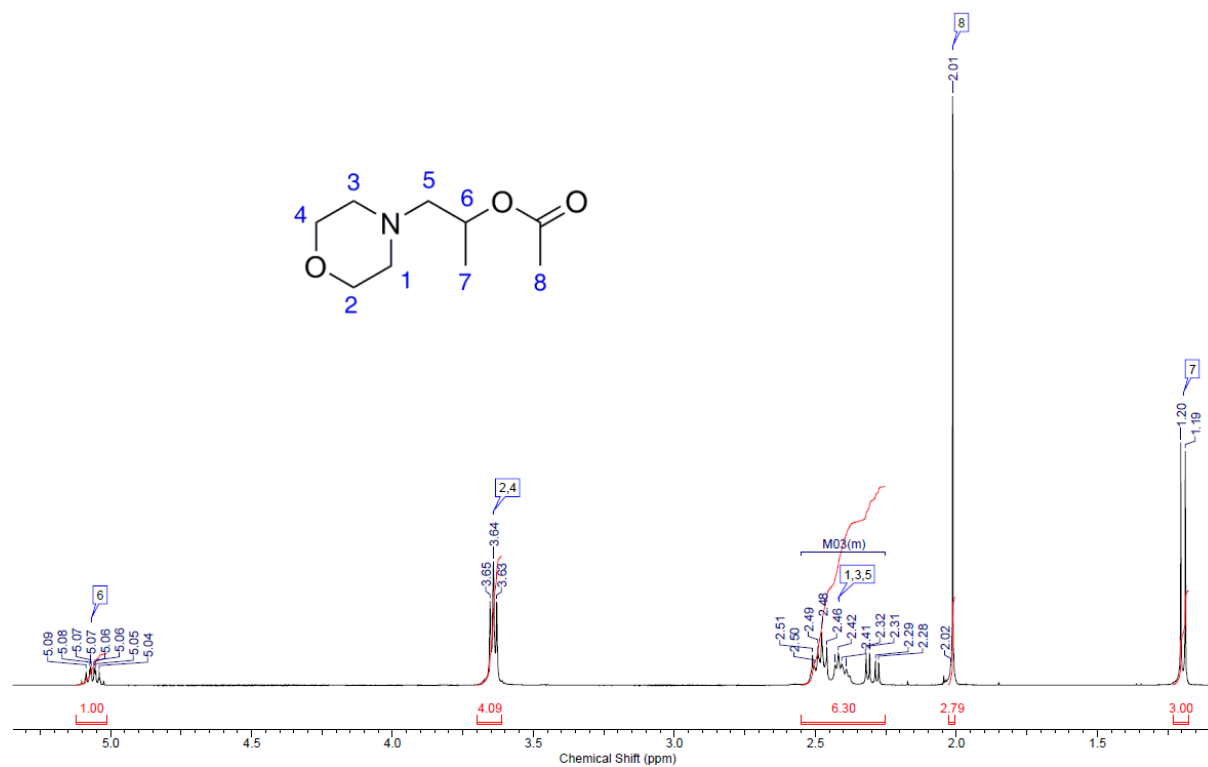

$^{13}\text{C}$  NMR spectrum of *rac*-**4a** (100 MHz,  $\text{CDCl}_3$ )

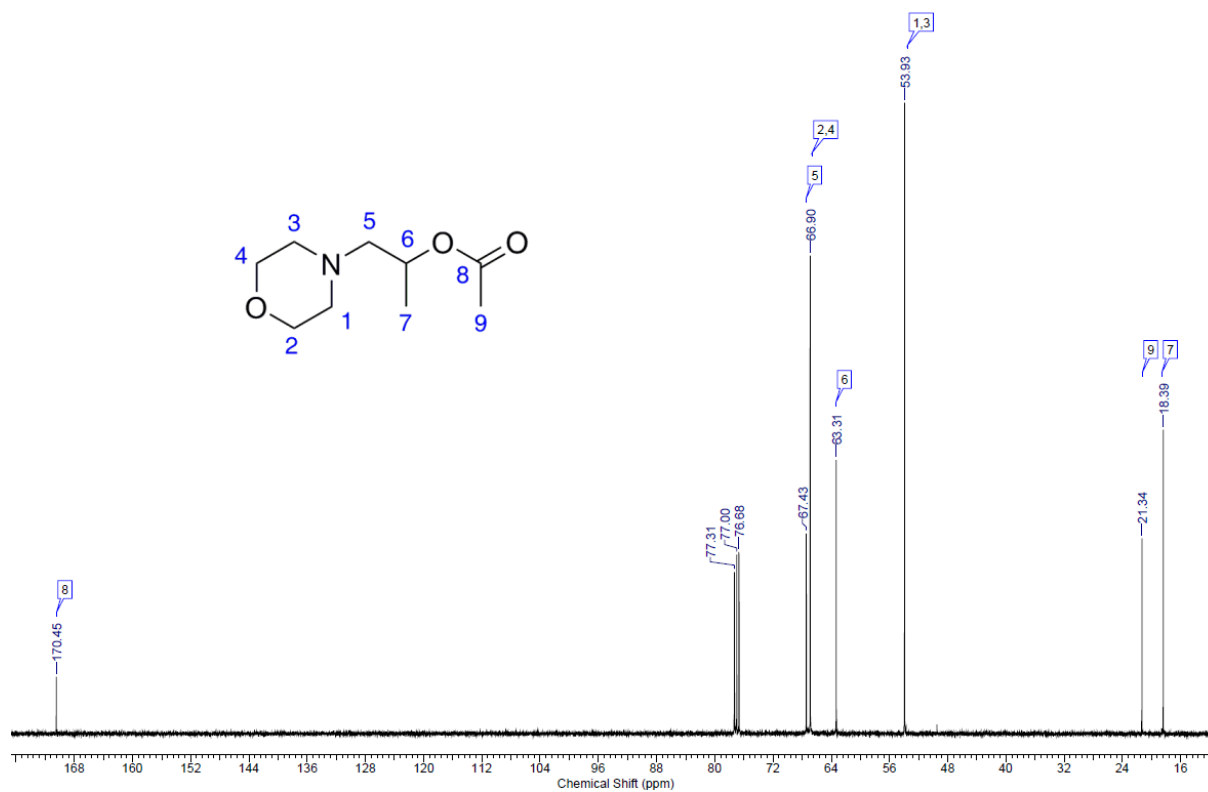

# MS spectrum of *rac*-**4a** (ESI-TOF)

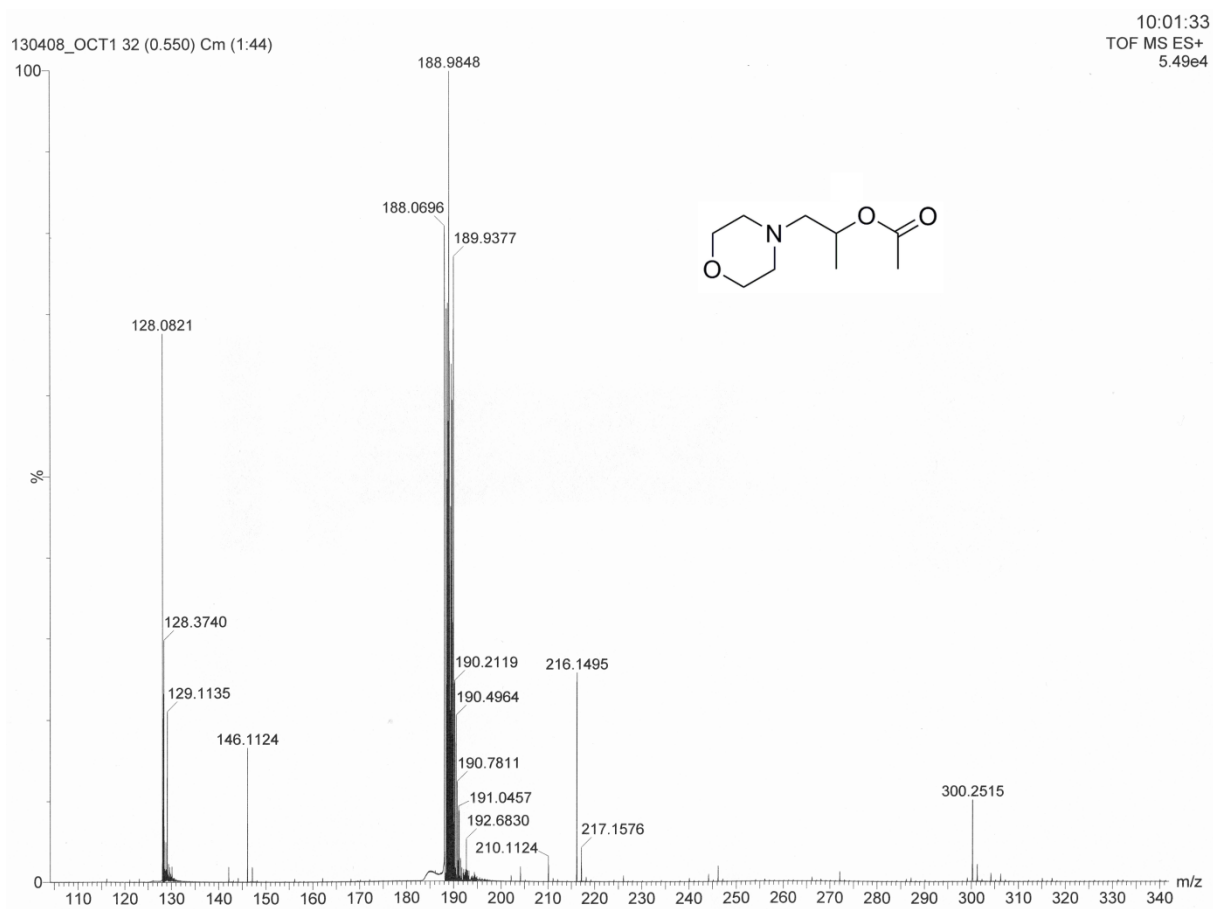

# FT-IR spectrum of *rac*-**4a** (neat)

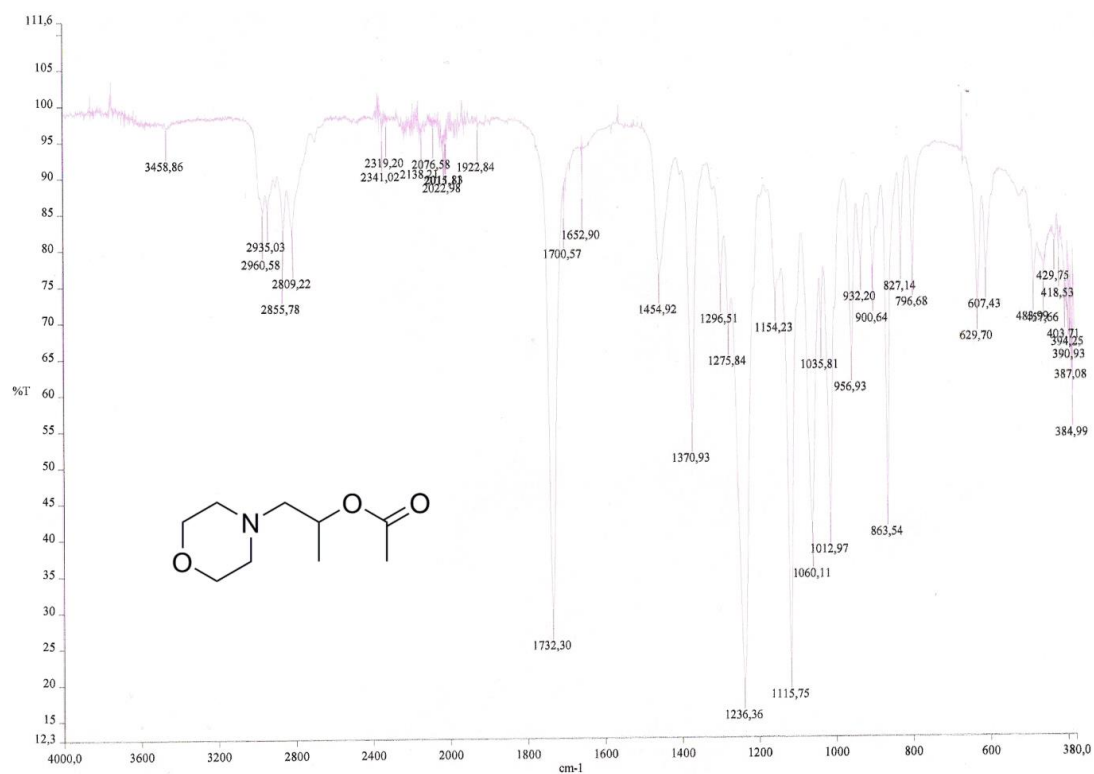



# **1-(Morpholin-4-yl)propan-2-yl butanoate (*rac*-**4b**)**

<sup>1</sup>H NMR spectrum of *rac*-**4b** (400 MHz, CDCl<sub>3</sub>)

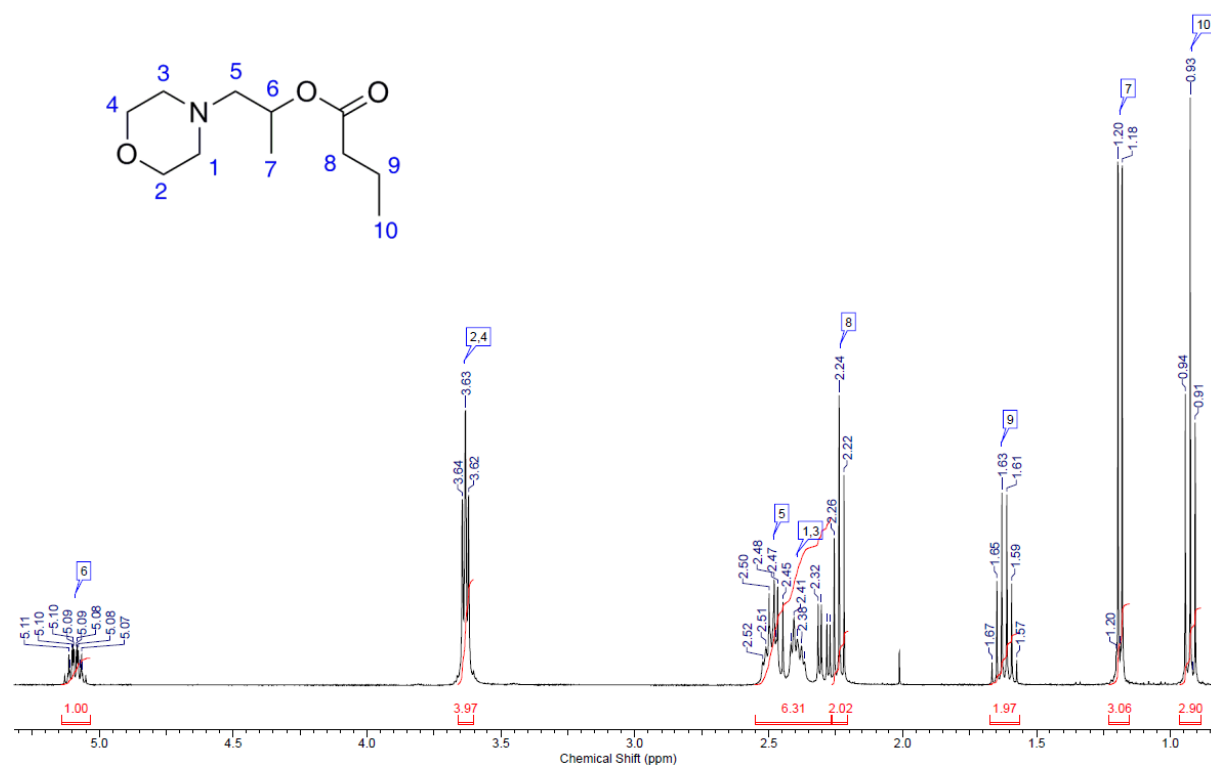

<sup>13</sup>C NMR spectrum of *rac*-**4b** (100 MHz, CDCl<sub>3</sub>)

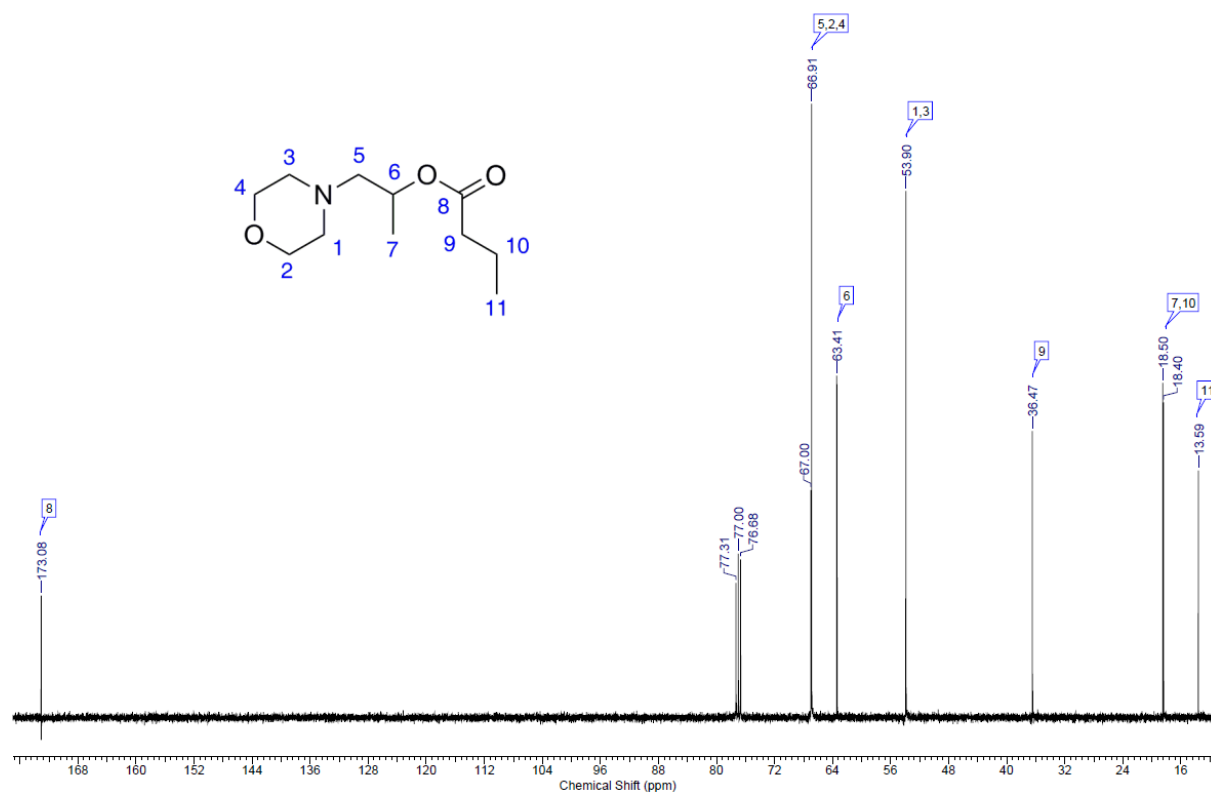

# MS spectrum of *rac*-**4b** (ESI-TOF)

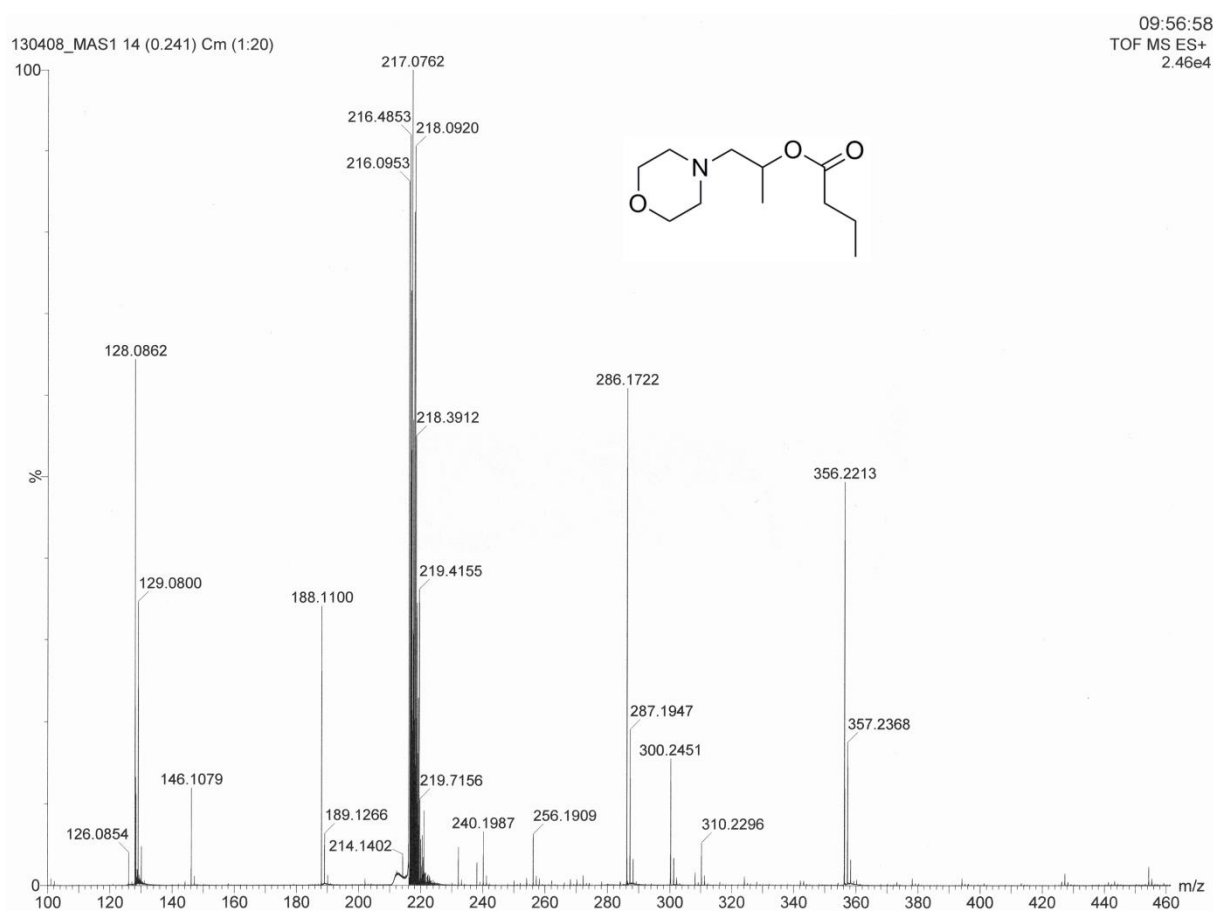

# FT-IR spectrum of *rac*-**4b** (neat)

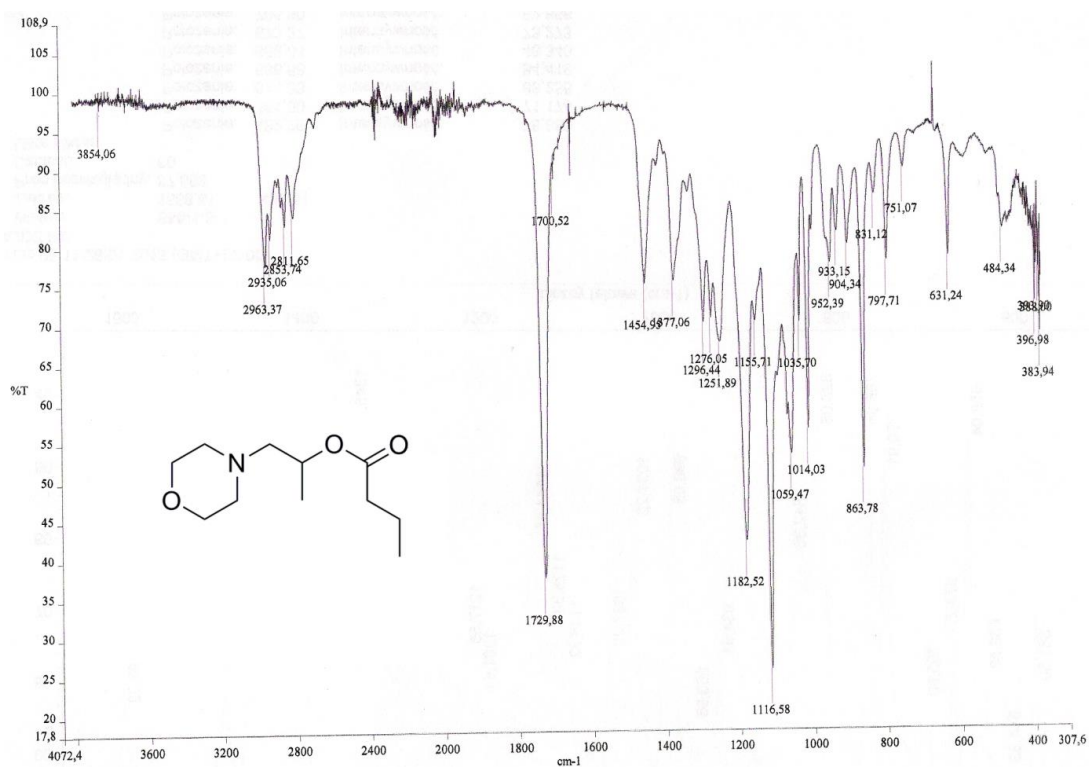

## 1-(Morpholin-4-yl)propan-2-yl decanoate (*rac*-**4c**)

$^1\text{H}$  NMR spectrum of *rac*-**4c** (400 MHz,  $\text{CDCl}_3$ )

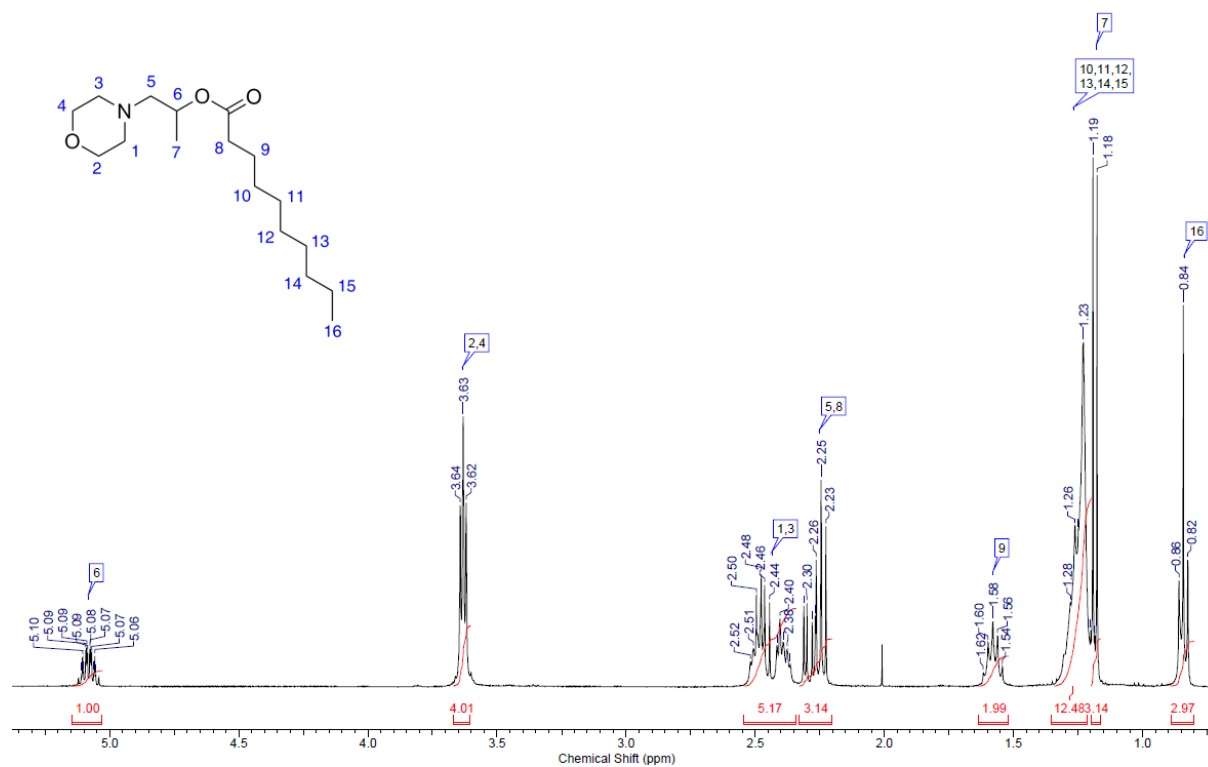

$^{13}\text{C}$  NMR spectrum of *rac*-**4c** (100 MHz,  $\text{CDCl}_3$ )

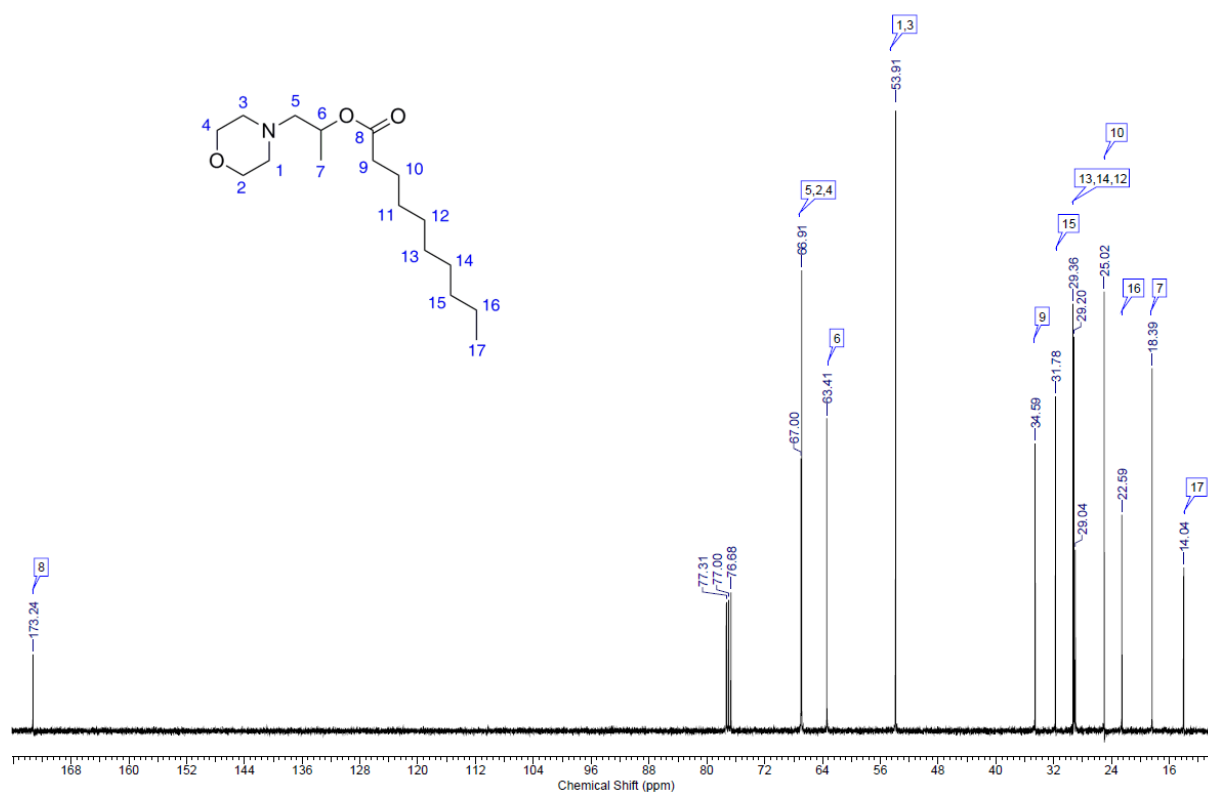

# MS spectrum of *rac*-**4c** (ESI-TOF)

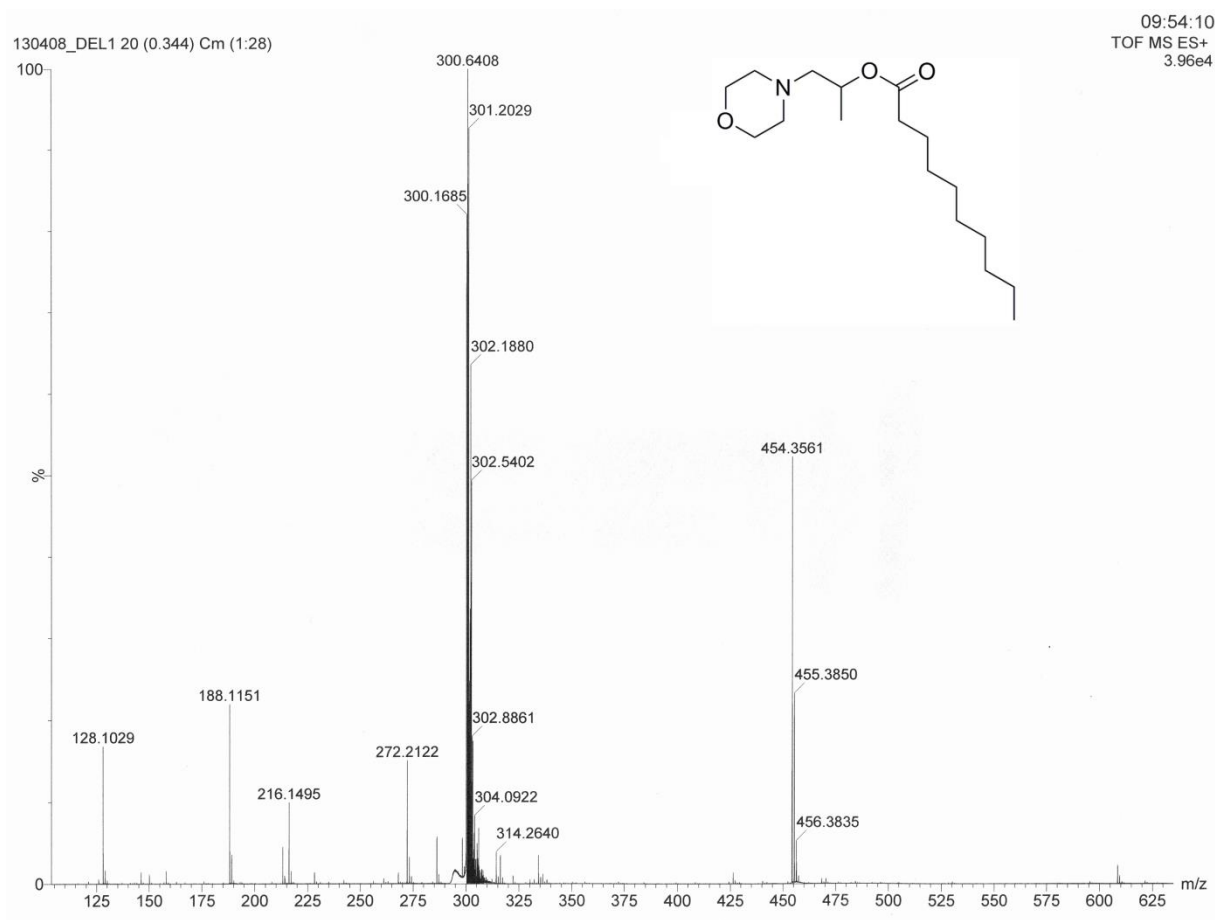

# FT-IR spectrum of *rac*-**4c** (neat)

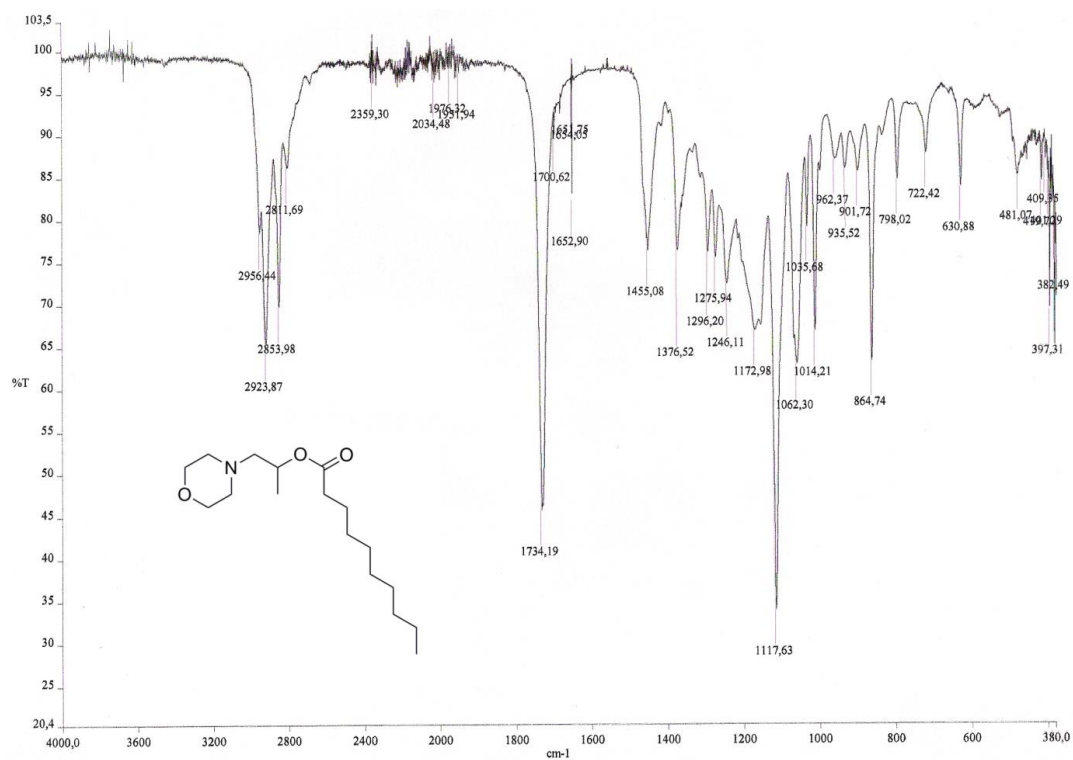

**(2S)-1-(Morpholin-4-yl)propan-2-yl (2R)-methoxy(phenyl)acetate [(S)-(+)-3-(R)-MPA]**

$^1\text{H}$  NMR spectrum of (S)-(+)-3-(R)-MPA (400 MHz,  $\text{CDCl}_3$ )

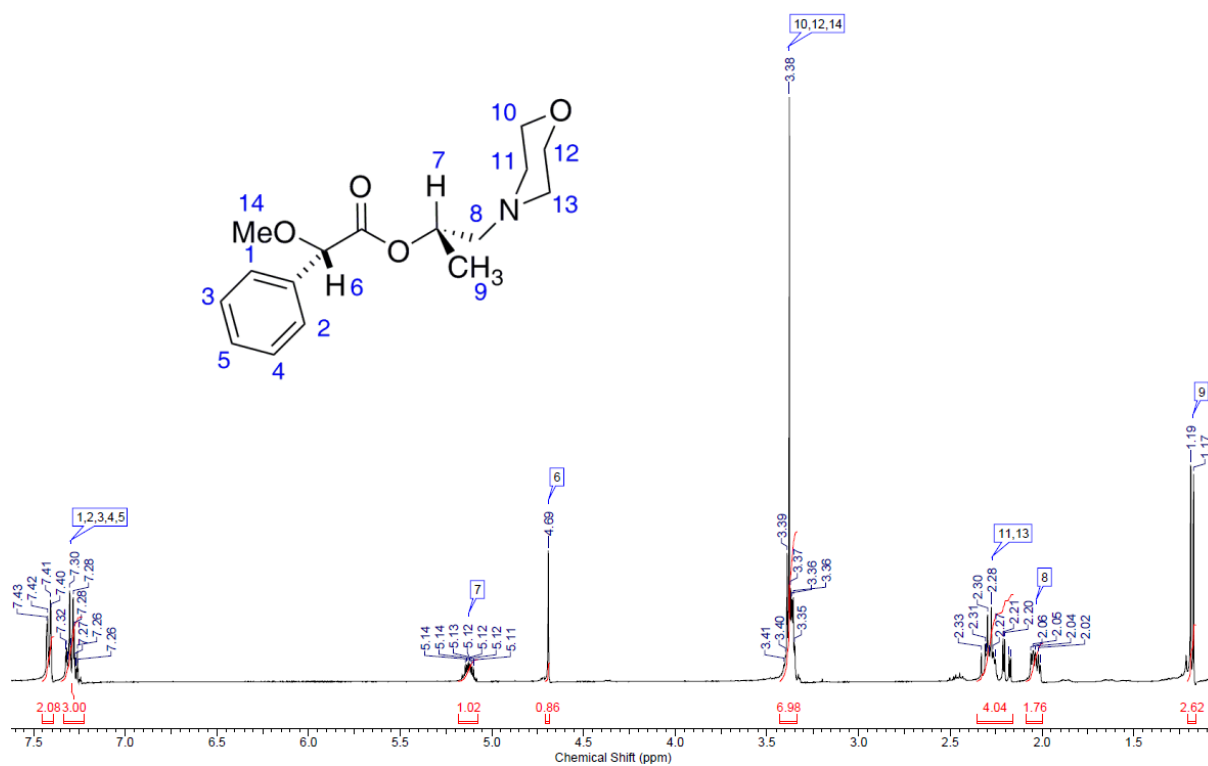

$^{13}\text{C}$  NMR spectrum of (S)-(+)-3-(R)-MPA (100 MHz,  $\text{CDCl}_3$ )

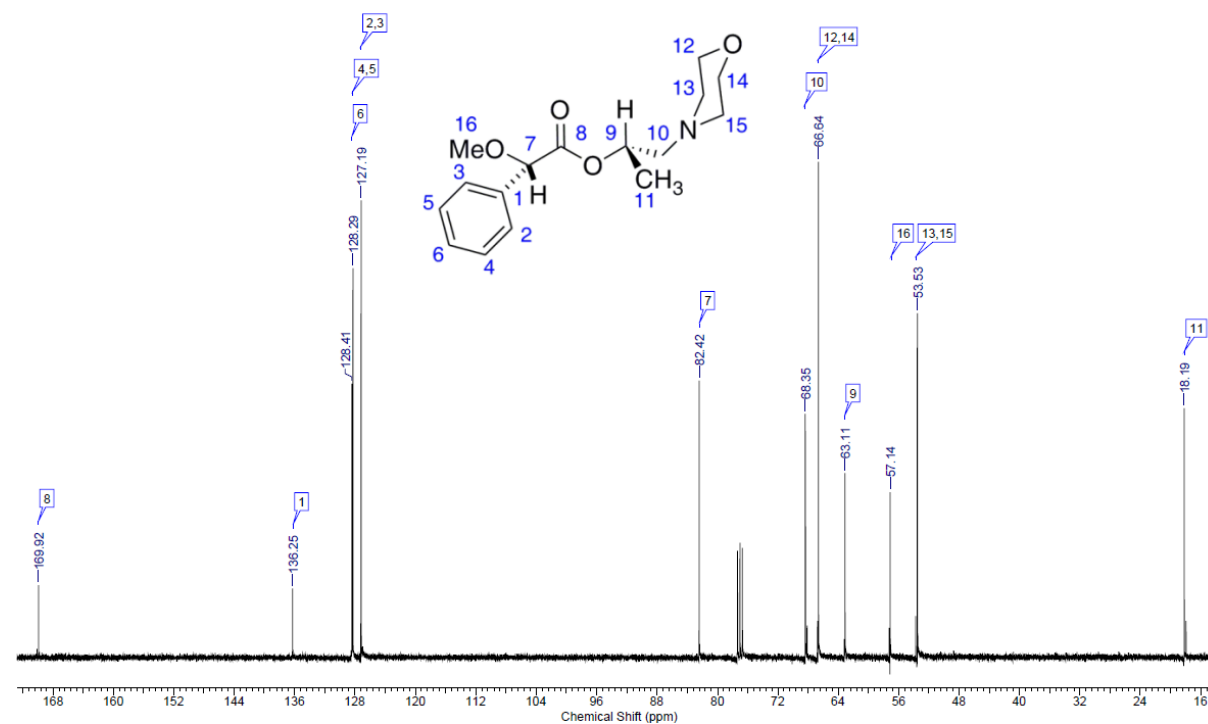

# MS spectrum of (S)-(+)-3-(R)-MPA (ESI-TOF)

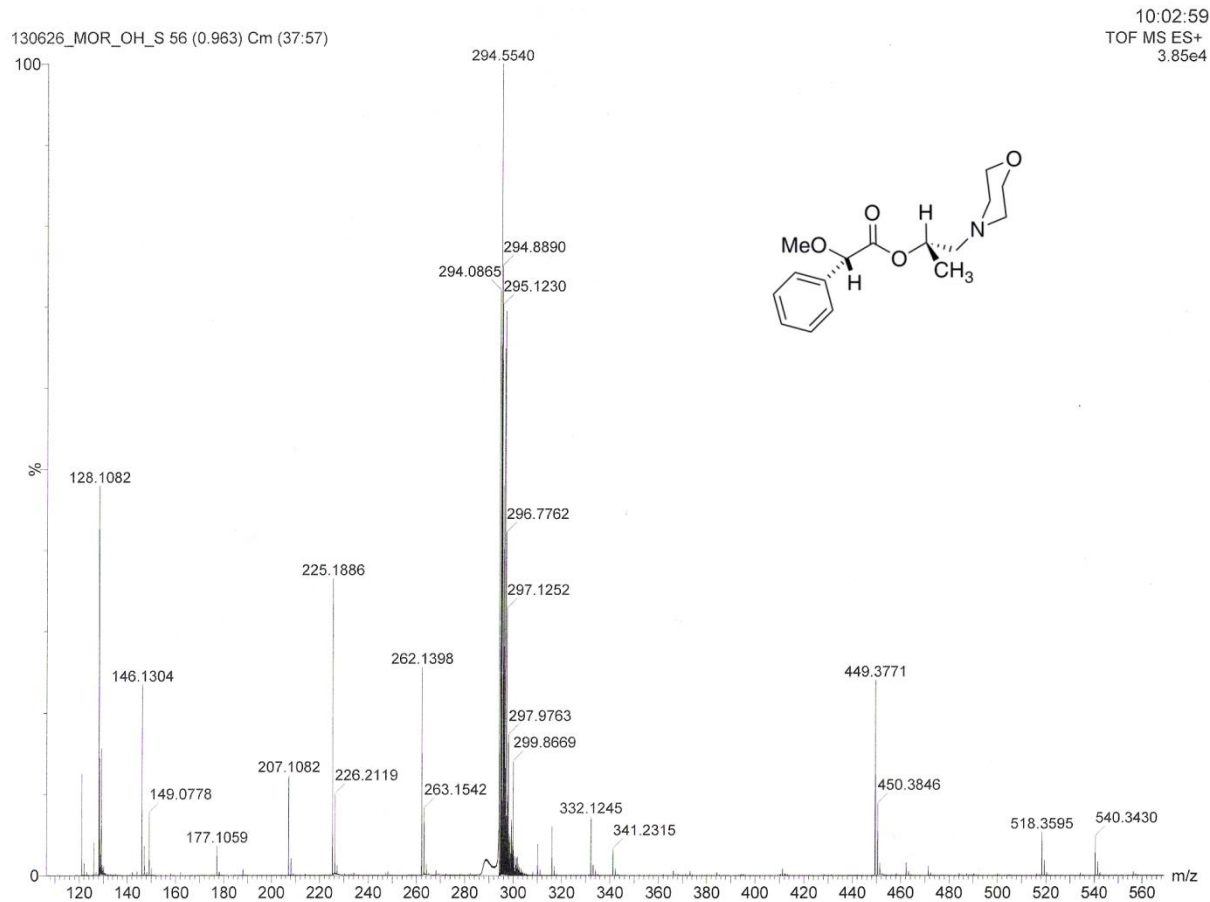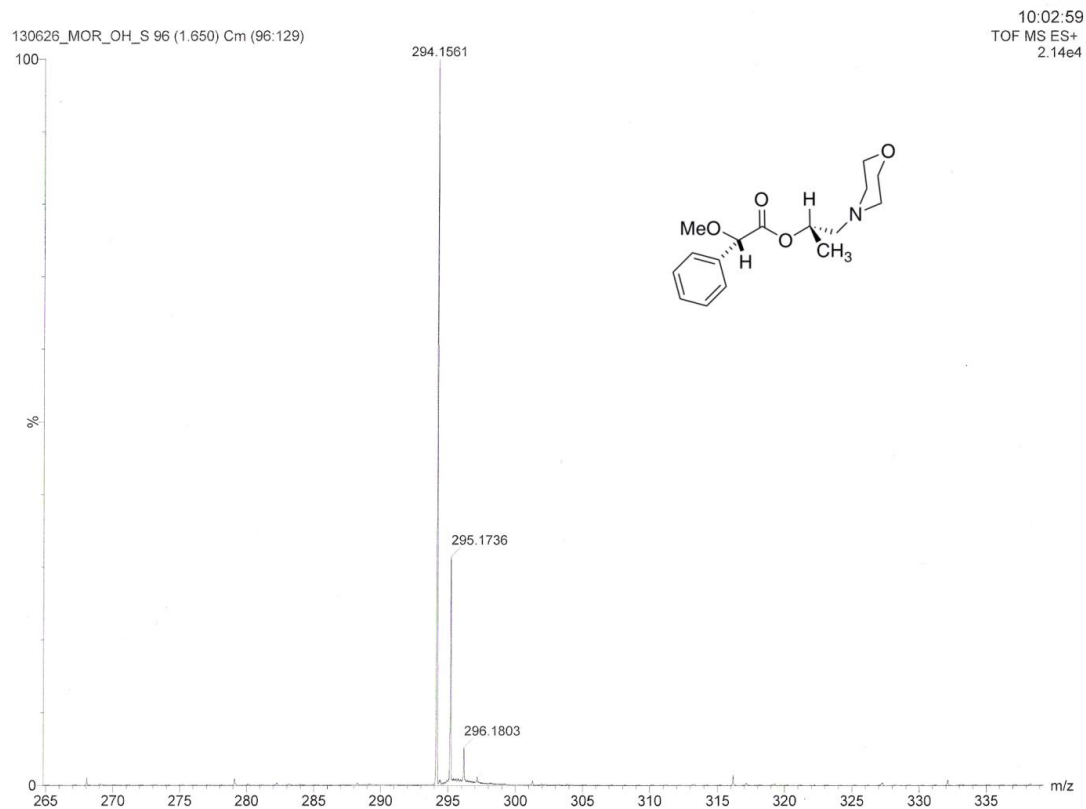

**(2S)-1-(Morpholin-4-yl)propan-2-yl (2S)-methoxy(phenyl)acetate [(S)-(+)-3-(R)-MPA]**

$^1\text{H}$  NMR spectrum of (S)-(+)-3-(R)-MPA (400 MHz,  $\text{CDCl}_3$ )

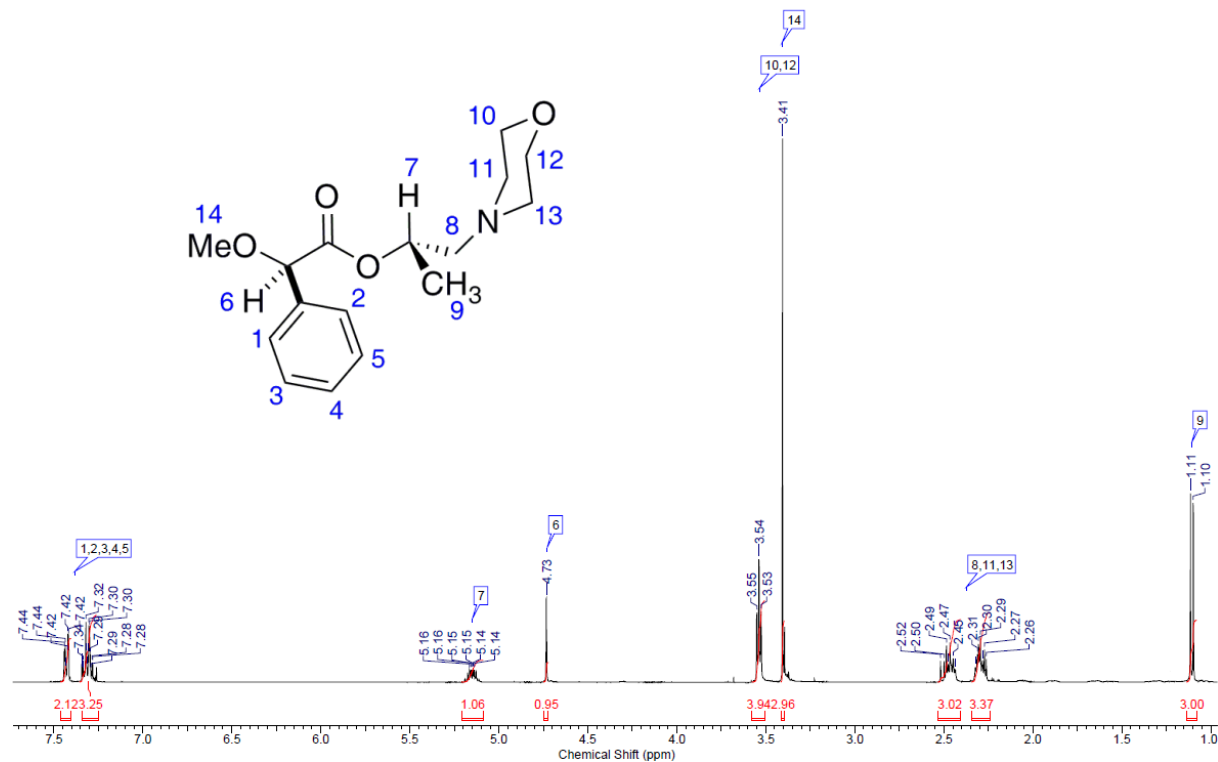

$^{13}\text{C}$  NMR spectrum of (S)-(+)-3-(R)-MPA (100 MHz,  $\text{CDCl}_3$ )

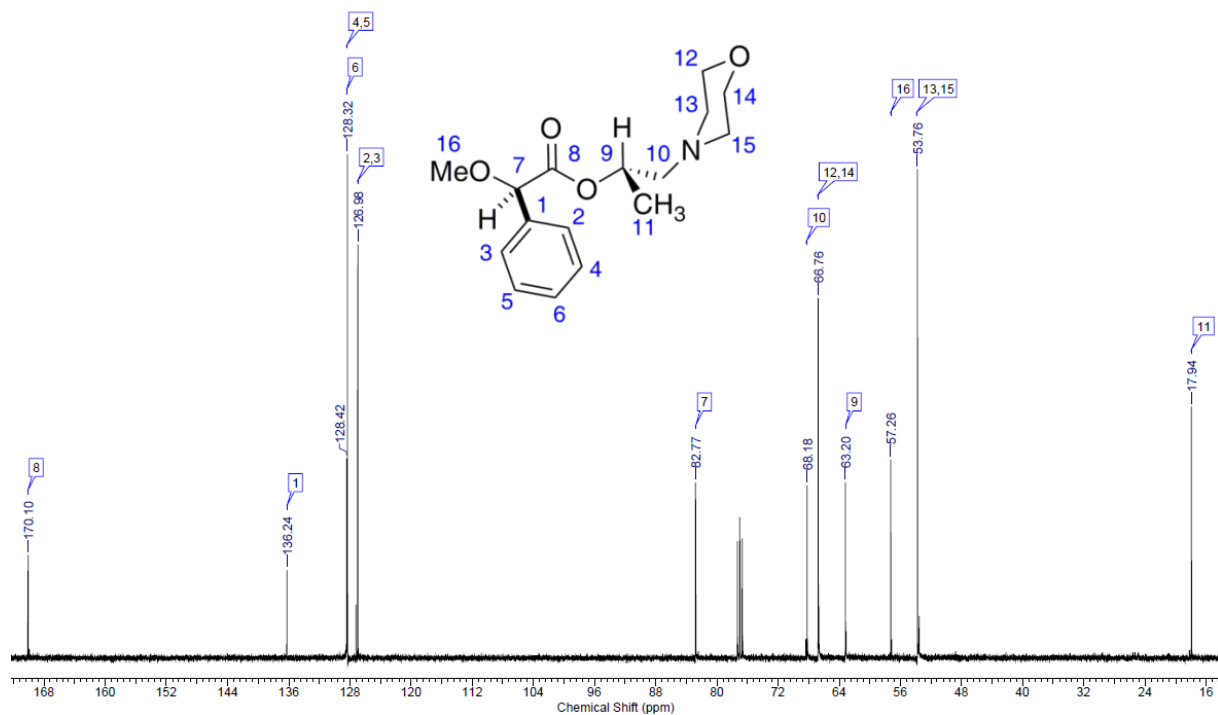

# MS spectrum of (S)-(+)-3-(R)-MPA (ESI-TOF)

130426\_MORF\_OHR 37 (0.636) Cm (1.45)

10:19:04  
TOF MS ES+  
7.74e4

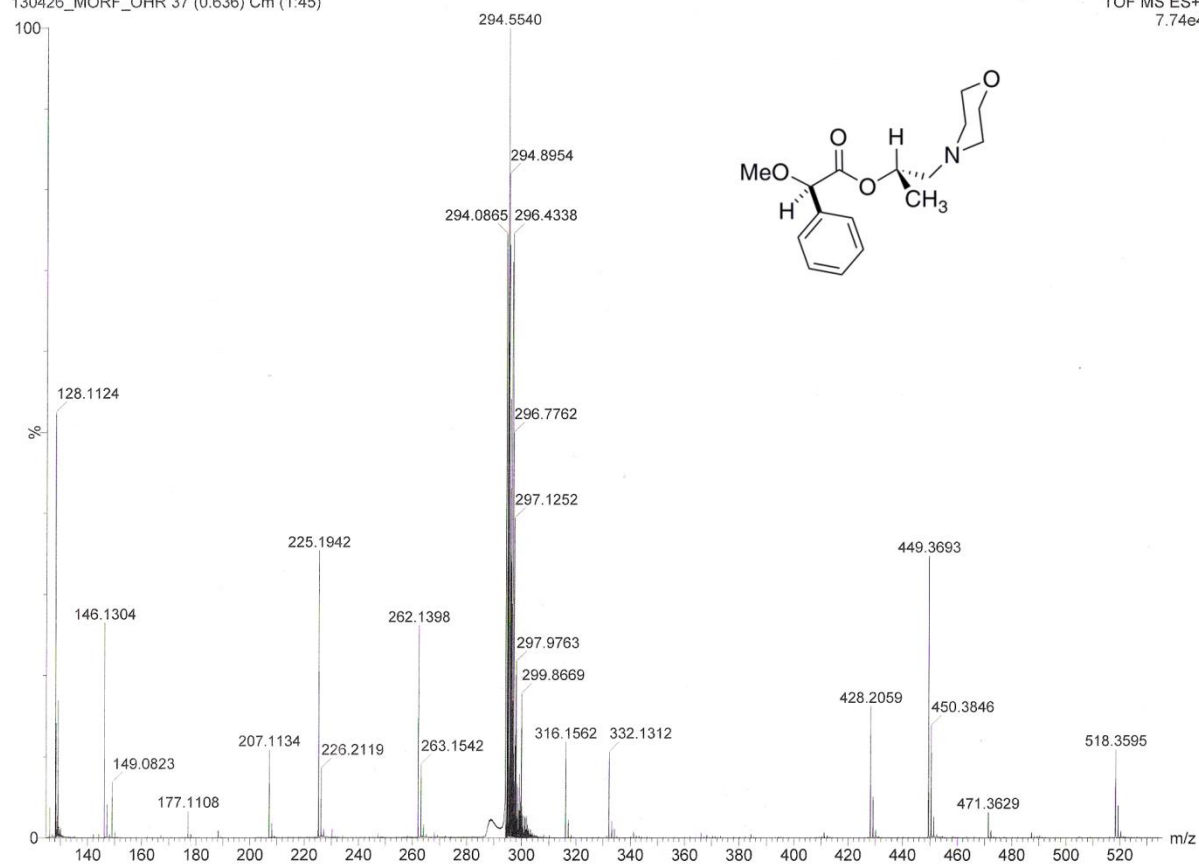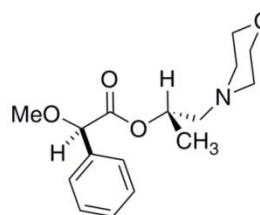

130426\_MORF\_OHR 111 (1.909) Cm (100:111)

10:19:04  
TOF MS ES+  
8.53e3

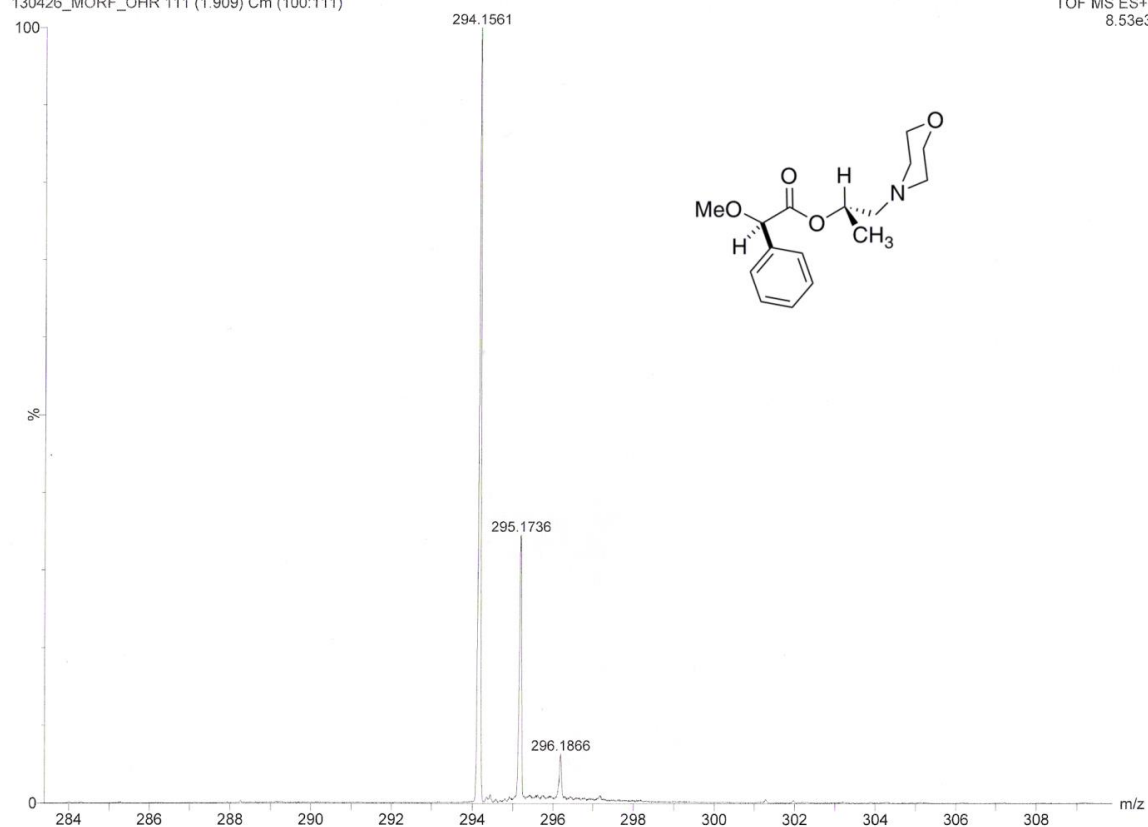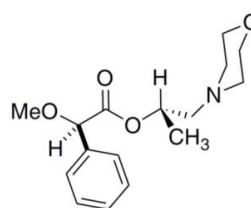



#### 4-(2-Chloropropyl)morpholine (*rac*-**5**)

$^1\text{H}$  NMR spectrum of *rac*-**5** (400 MHz,  $\text{CDCl}_3$ )

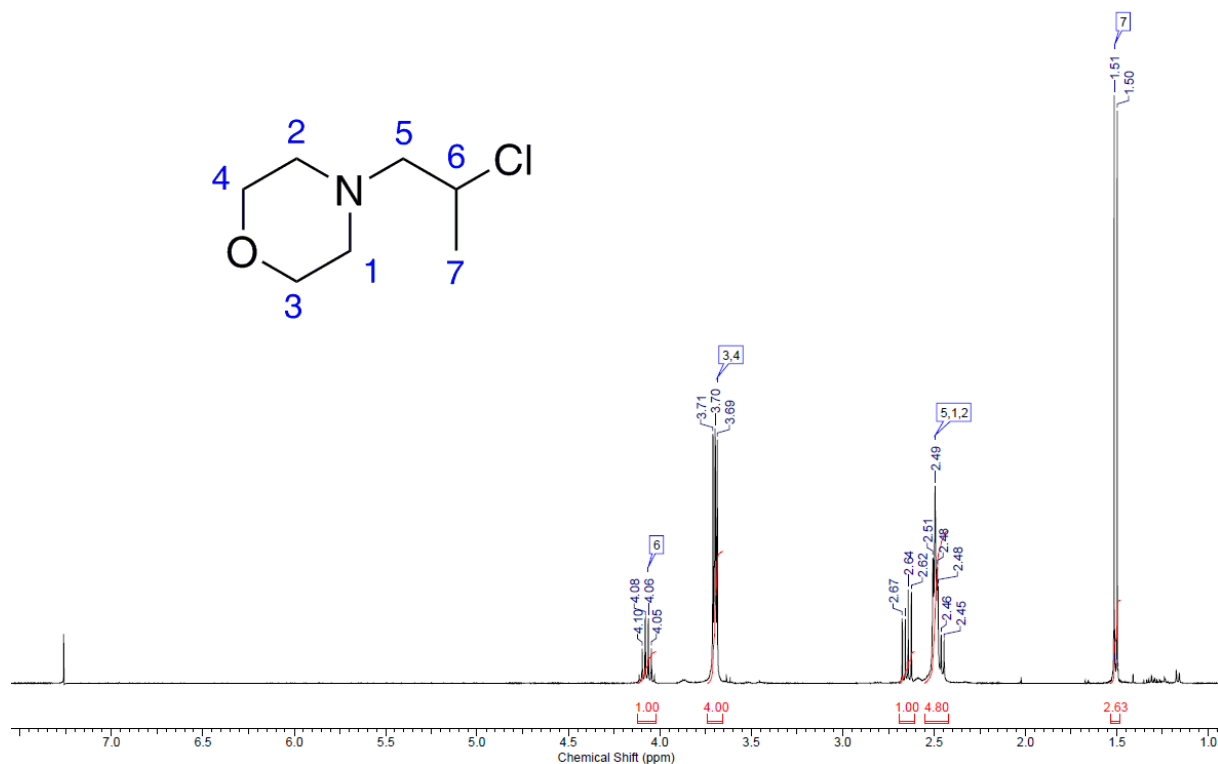

$^{13}\text{C}$  NMR spectrum of *rac*-**5** (100 MHz,  $\text{CDCl}_3$ )

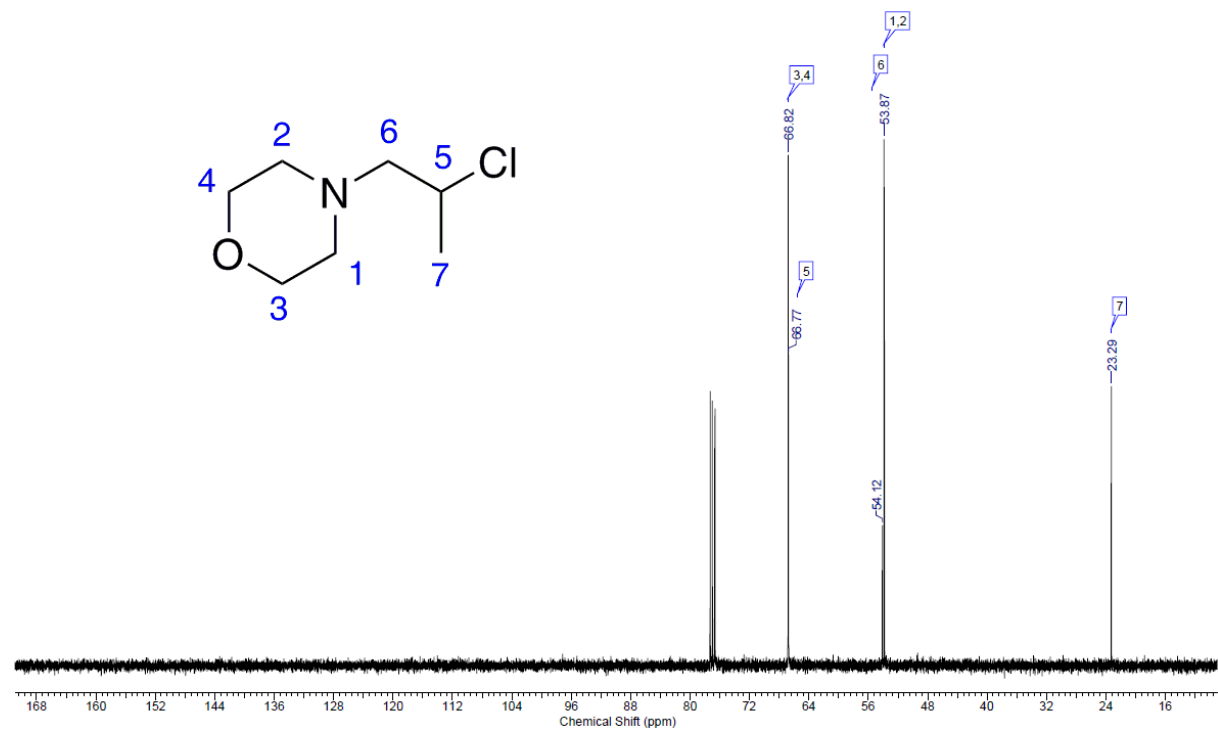

# MS spectrum of *rac*-**5** (ESI-TOF)

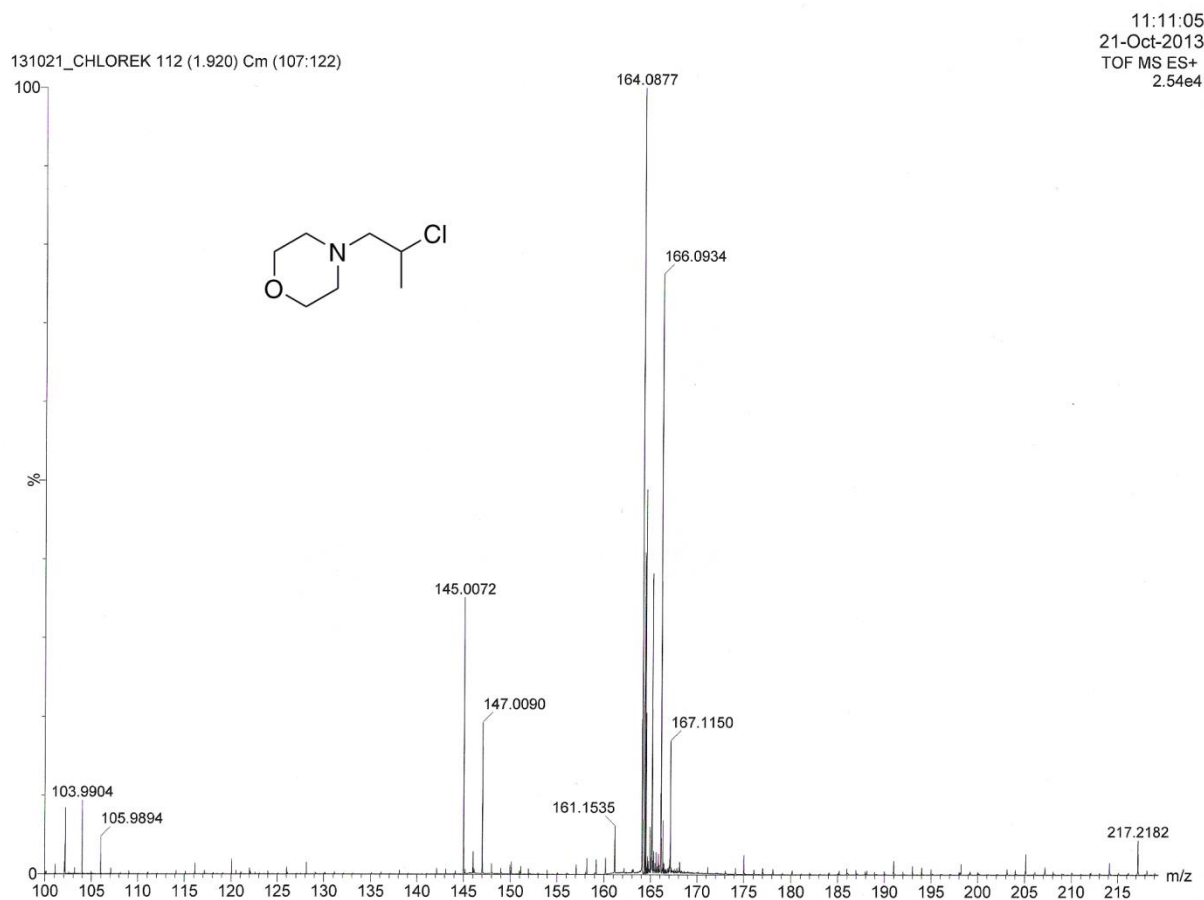

## FT-IR spectrum of *rac*-**5** (neat)

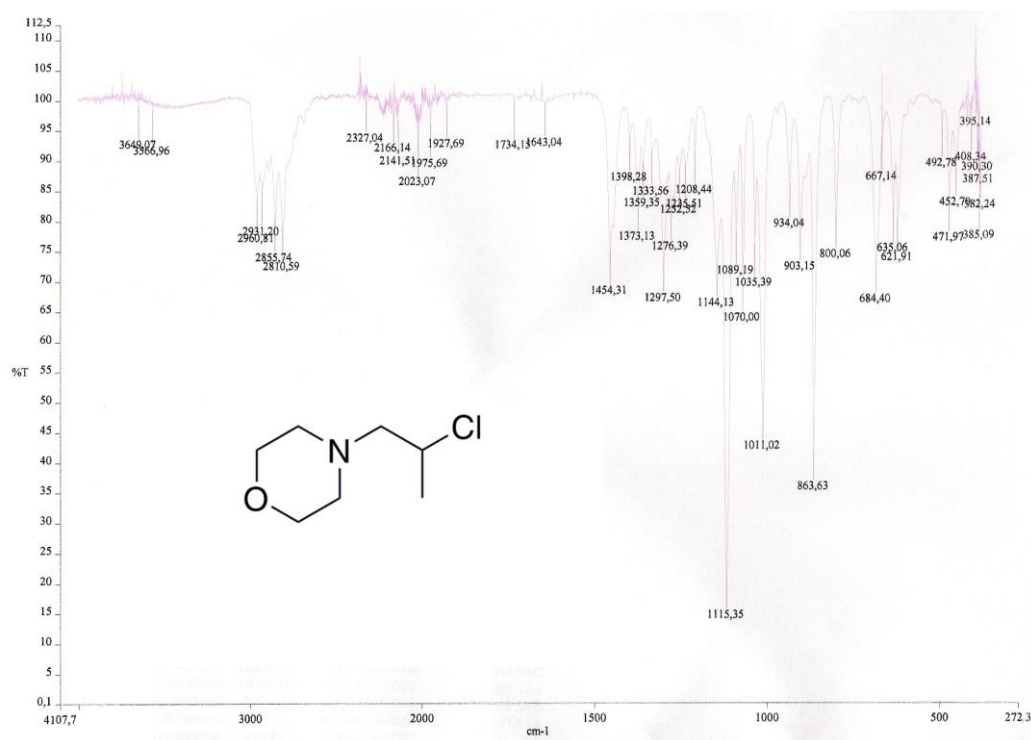

# **4-[2-(Phenylsulfanyl)propyl]morpholine (*rac*-5-SPh)**

$^1\text{H}$  NMR spectrum of *rac*-5-SPh (400 MHz,  $\text{CDCl}_3$ )

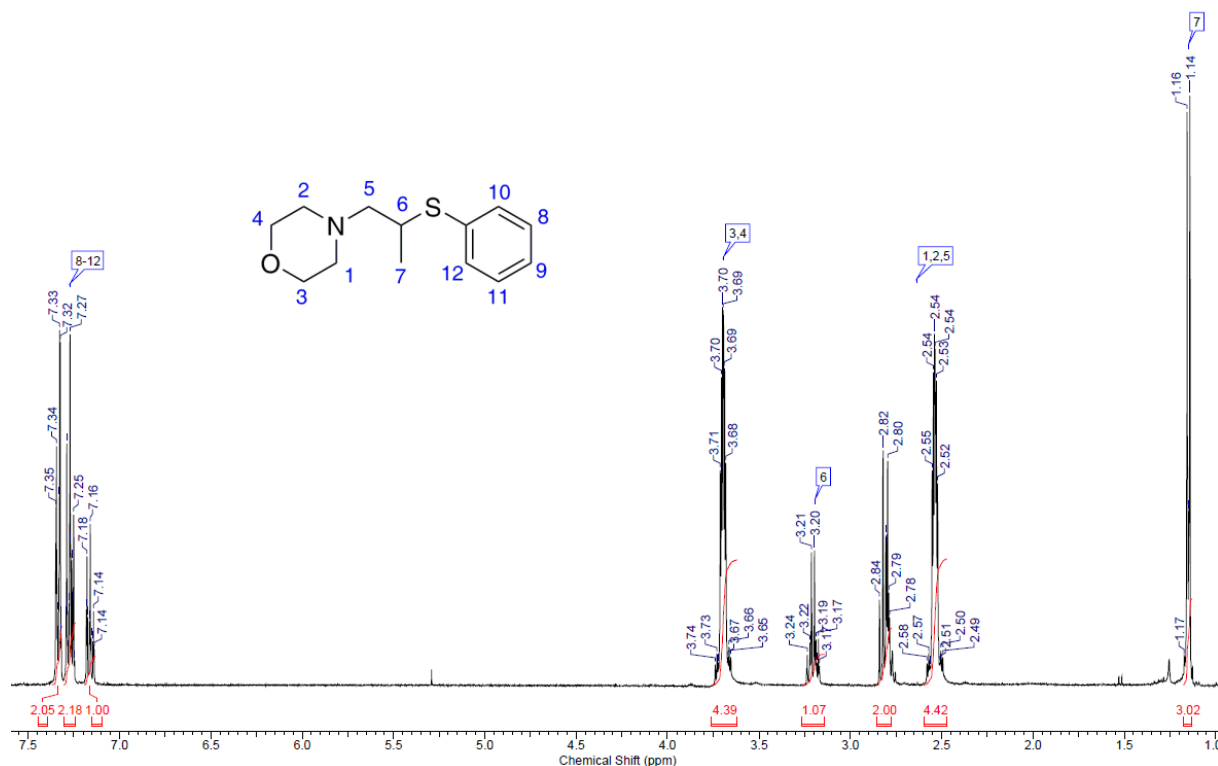

$^{13}\text{C}$  NMR spectrum of *rac*-5-SPh (100 MHz,  $\text{CDCl}_3$ )

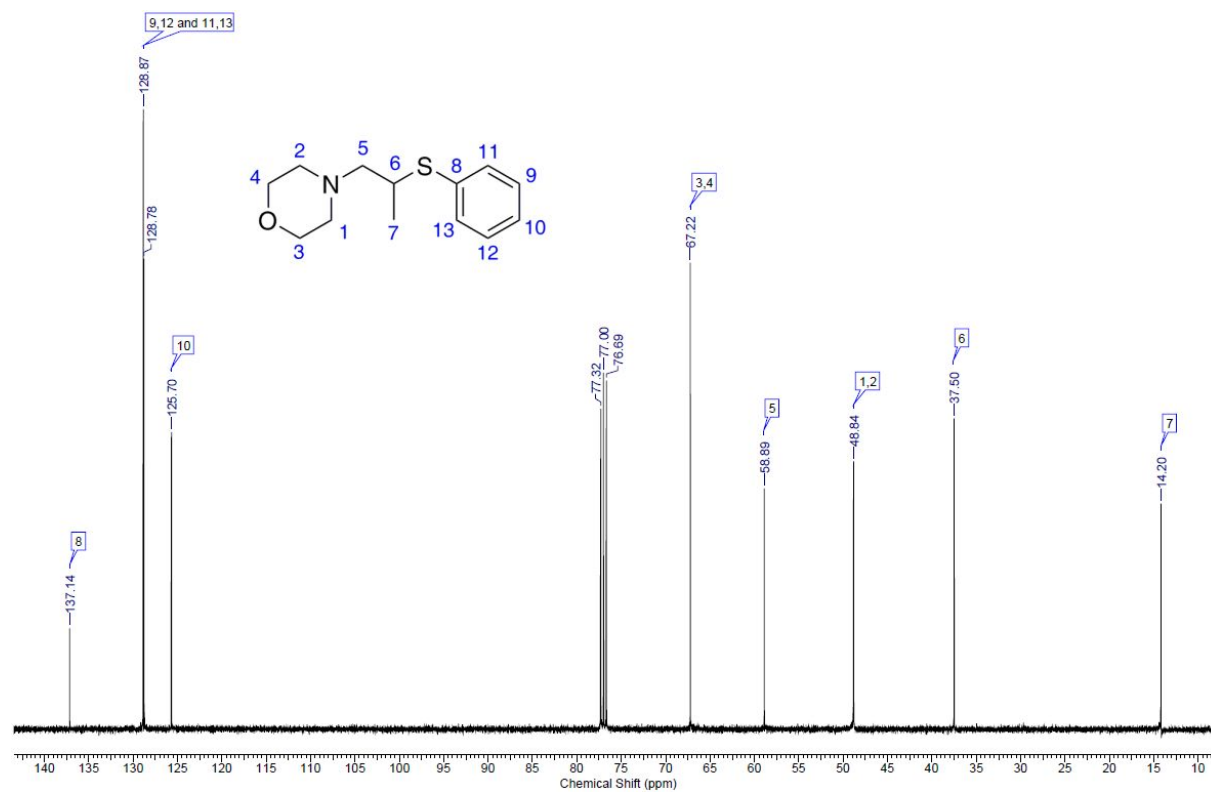

# MS spectrum of *rac*-**5-SPh** (ESI-TOF)

140527\_DC\_13-18 31 (0.532) Cm (30:50)

TOF MS ES+  
9.93e3

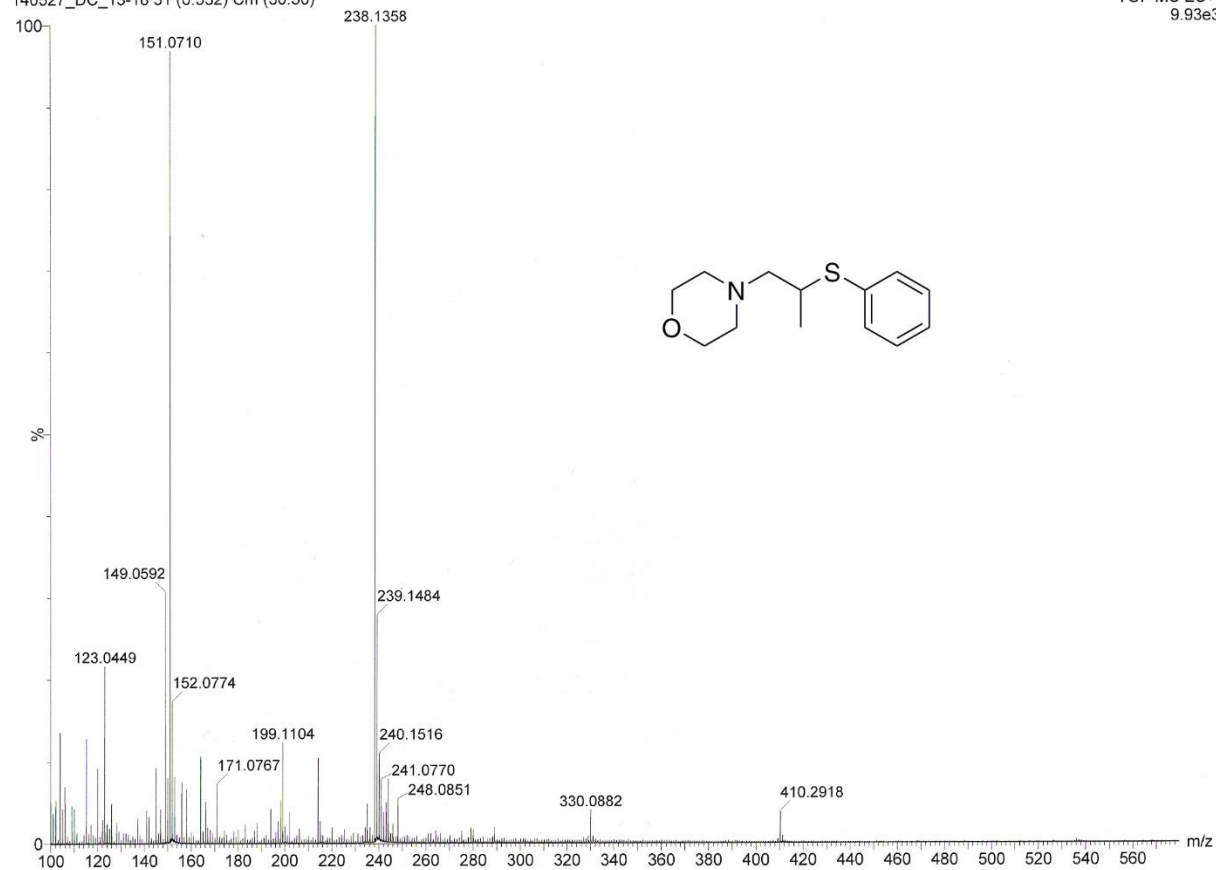

### Diphenylacetic acid chloride (**8**)

$^1\text{H}$  NMR spectrum of **8** (400 MHz,  $\text{CDCl}_3$ )

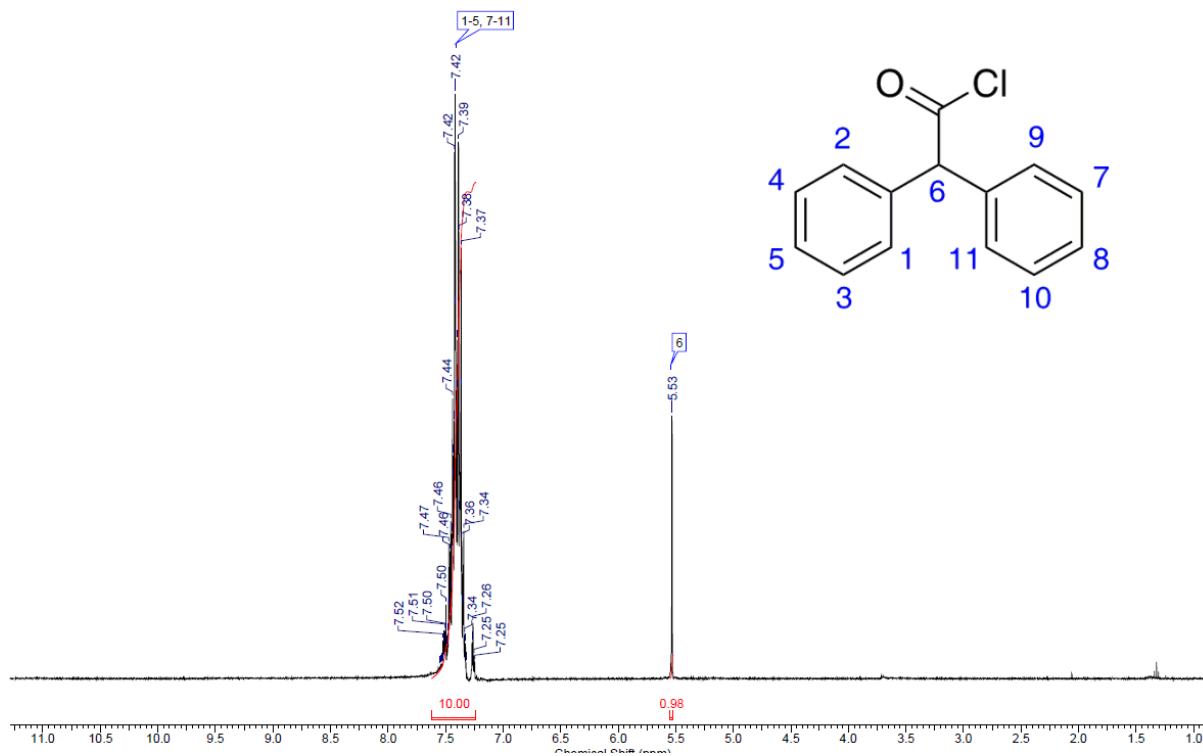

$^{13}\text{C}$  NMR spectrum of **8** (100 MHz,  $\text{CDCl}_3$ )

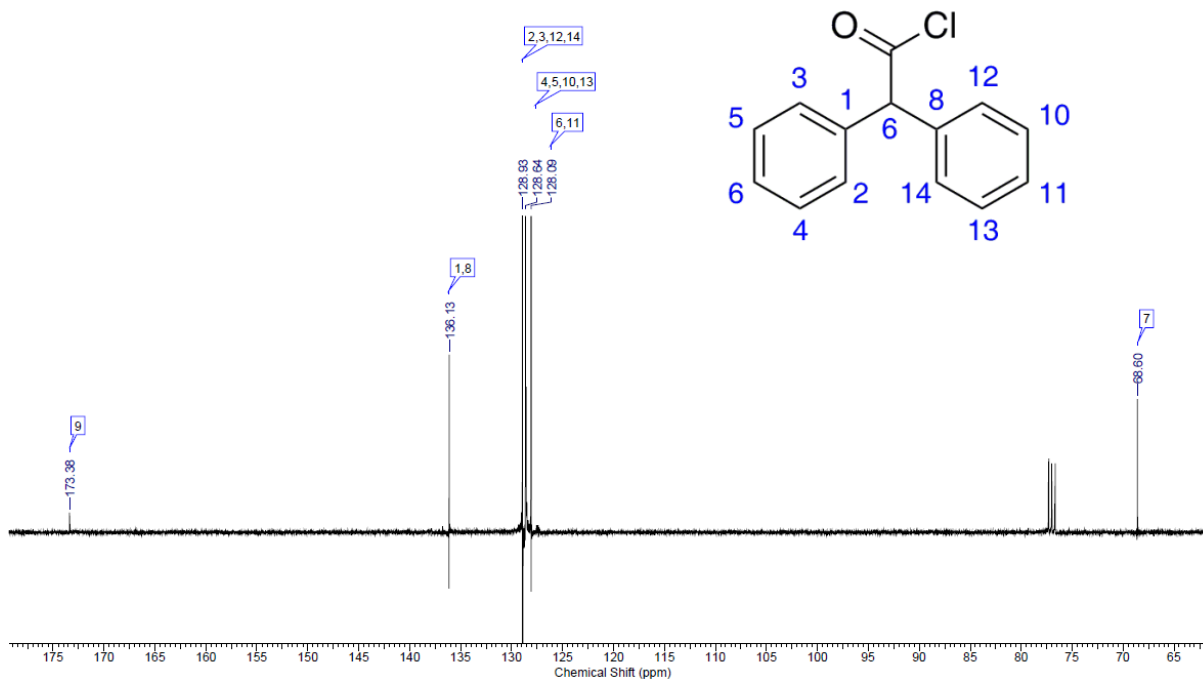

## *N*-diphenylacetyl-1-pyrrolidine (**9**)

$^1\text{H}$  NMR spectrum of **9** (400 MHz,  $\text{CDCl}_3$ )

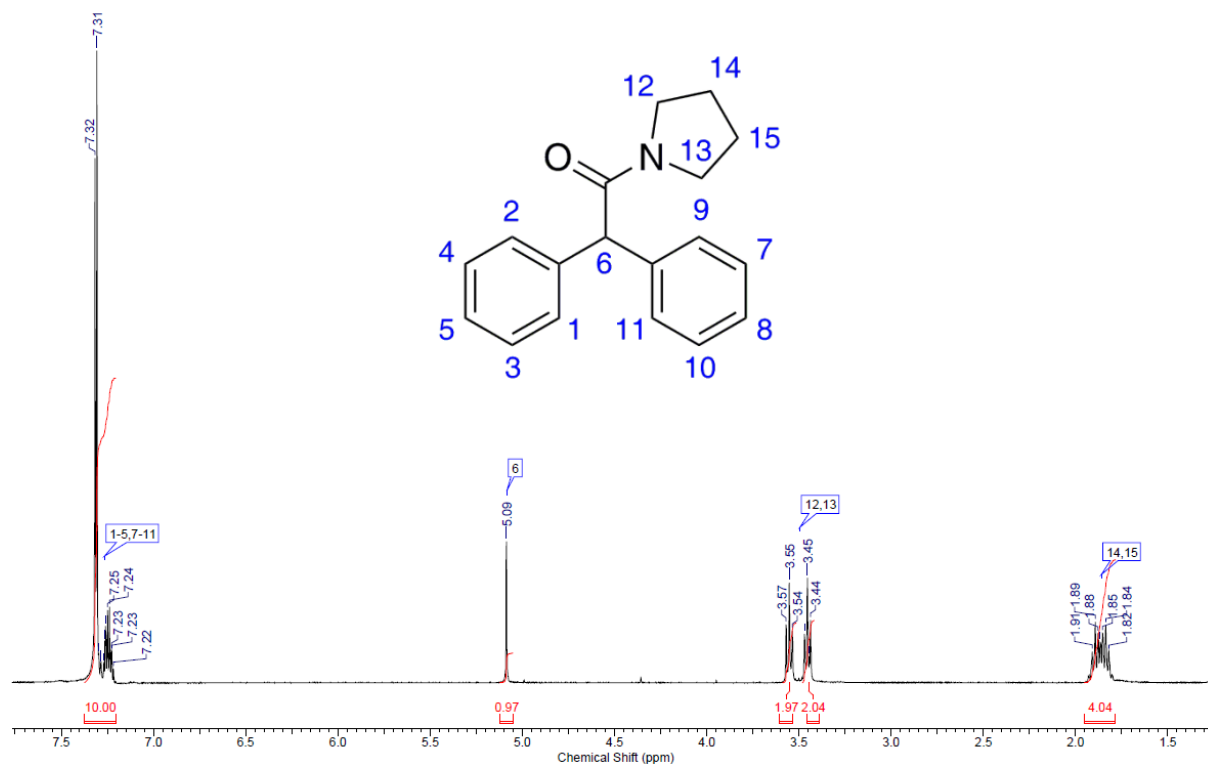

$^{13}\text{C}$  NMR spectrum of **9** (100 MHz,  $\text{CDCl}_3$ )

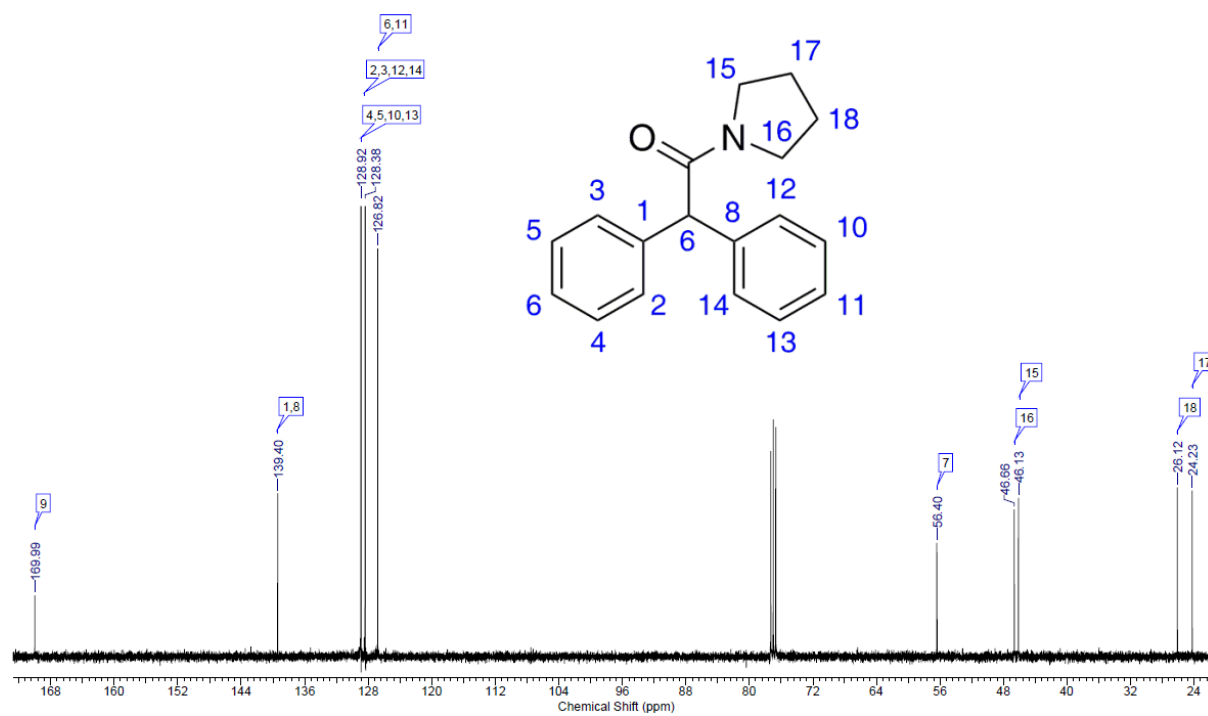

# MS spectrum of **9** (ESI-TOF)

11:01:33  
21-Oct-2013  
TOF MS ES+  
2.77e4

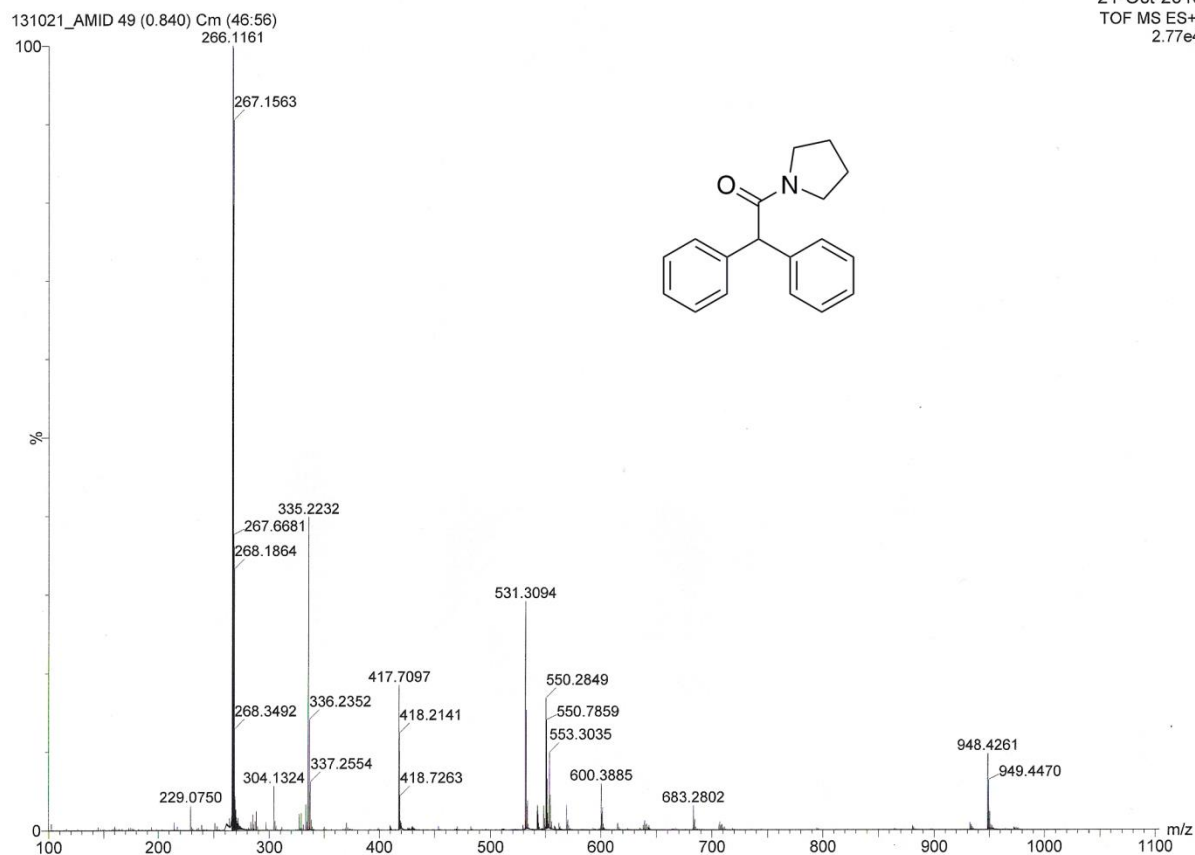

## FT-IR spectrum of **9** (neat)

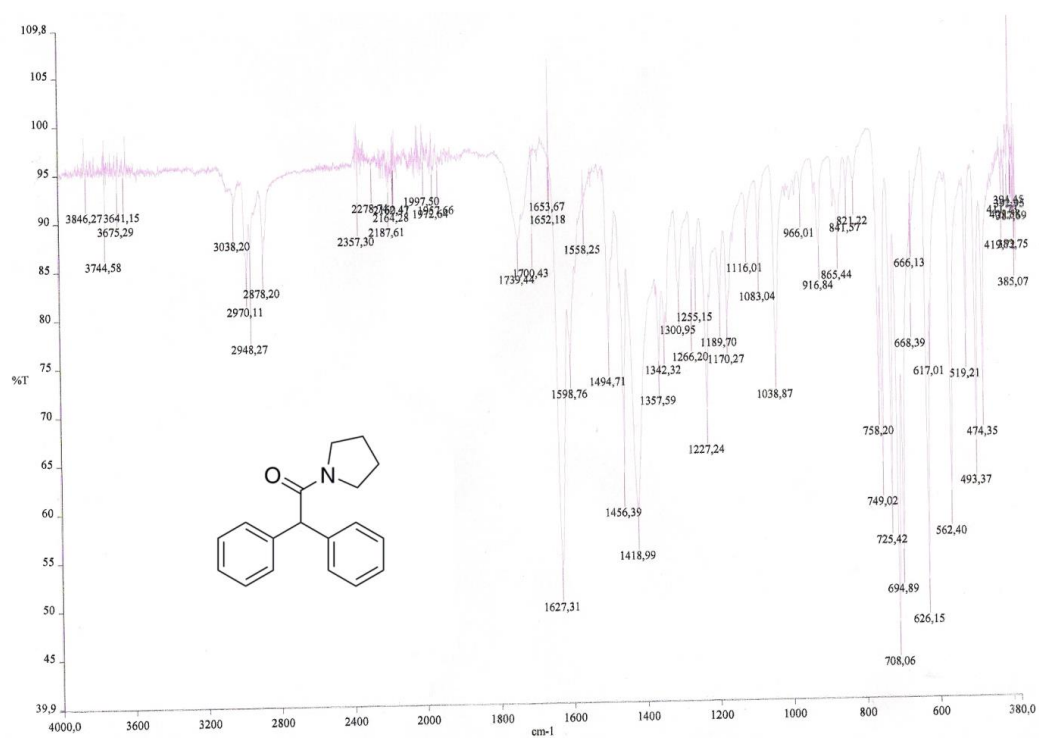

**2-[2-(Morpholin-4-yl)propoxy]-2,2-diphenyl-1-(pyrrolidin-1-yl)ethan-1-one (*rac*-**10**)**

$^1\text{H}$  NMR spectrum of *rac*-**10** (500 MHz,  $\text{CD}_3\text{CN}$ )

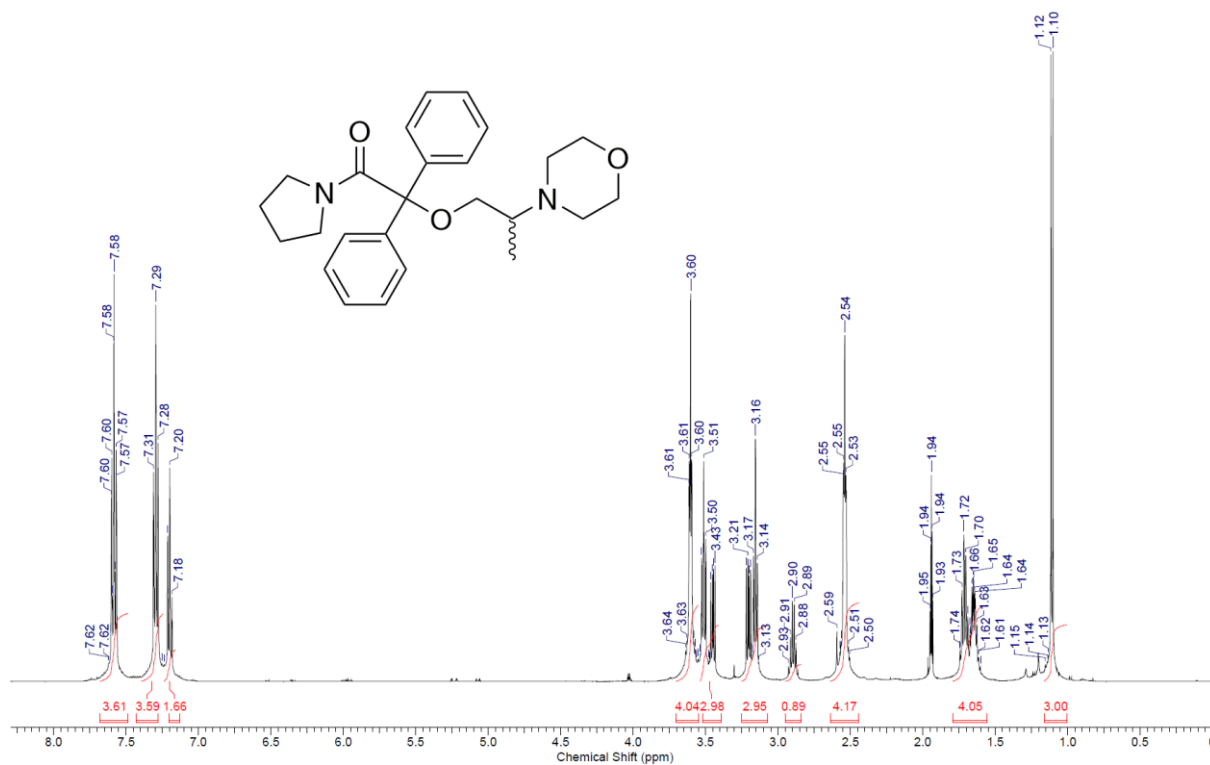

$^{13}\text{C}$  NMR spectrum of *rac*-**10** (126 MHz,  $\text{CD}_3\text{CN}$ )

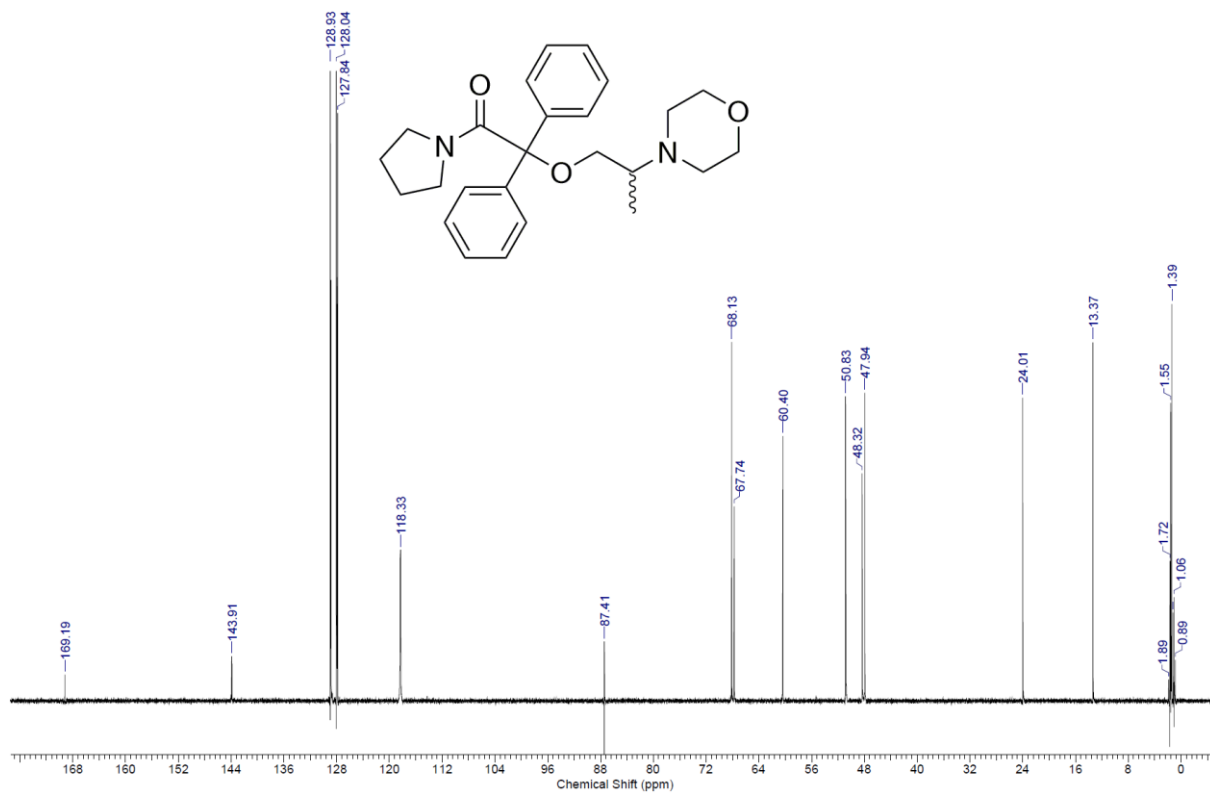



$^{13}\text{C}$  DEPT-135 NMR spectrum of *rac*-**10** (126 MHz,  $\text{CD}_3\text{CN}$ )

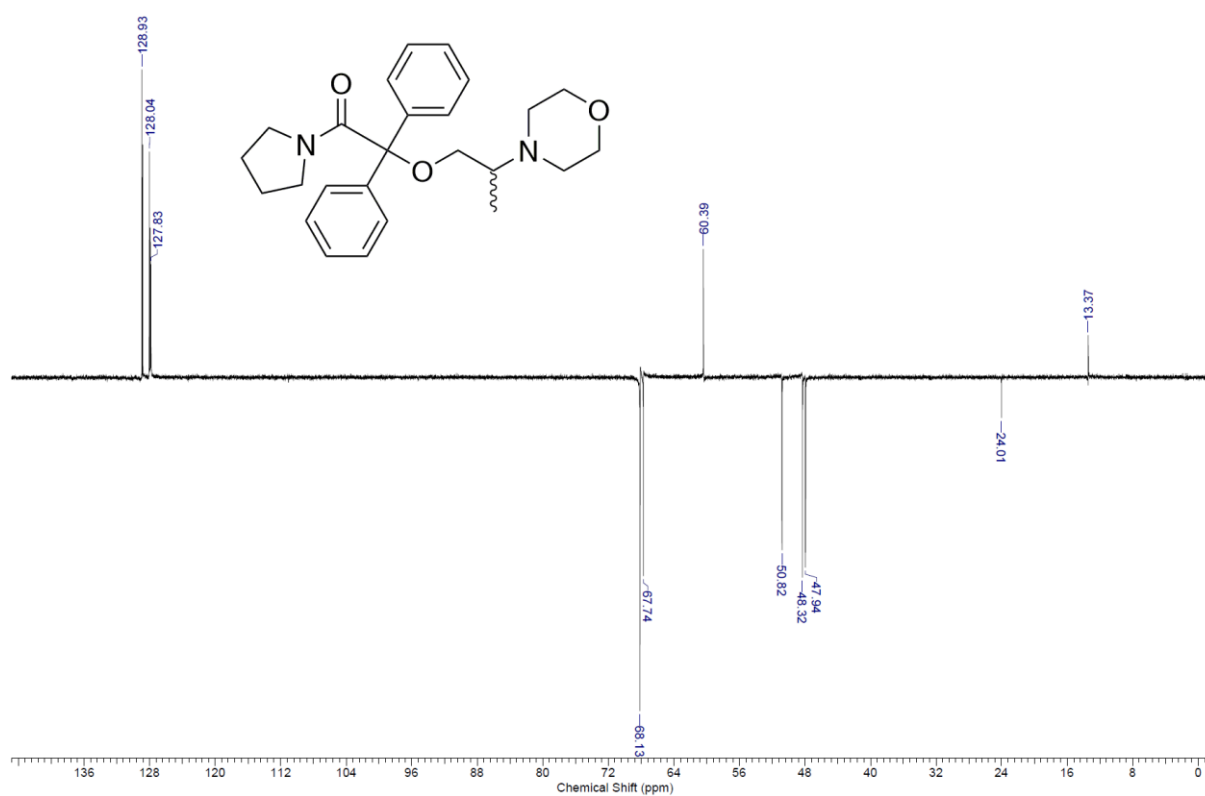

2D NMR (HSQC) spectrum of *rac*-**10** (126 MHz,  $\text{CD}_3\text{CN}$ )

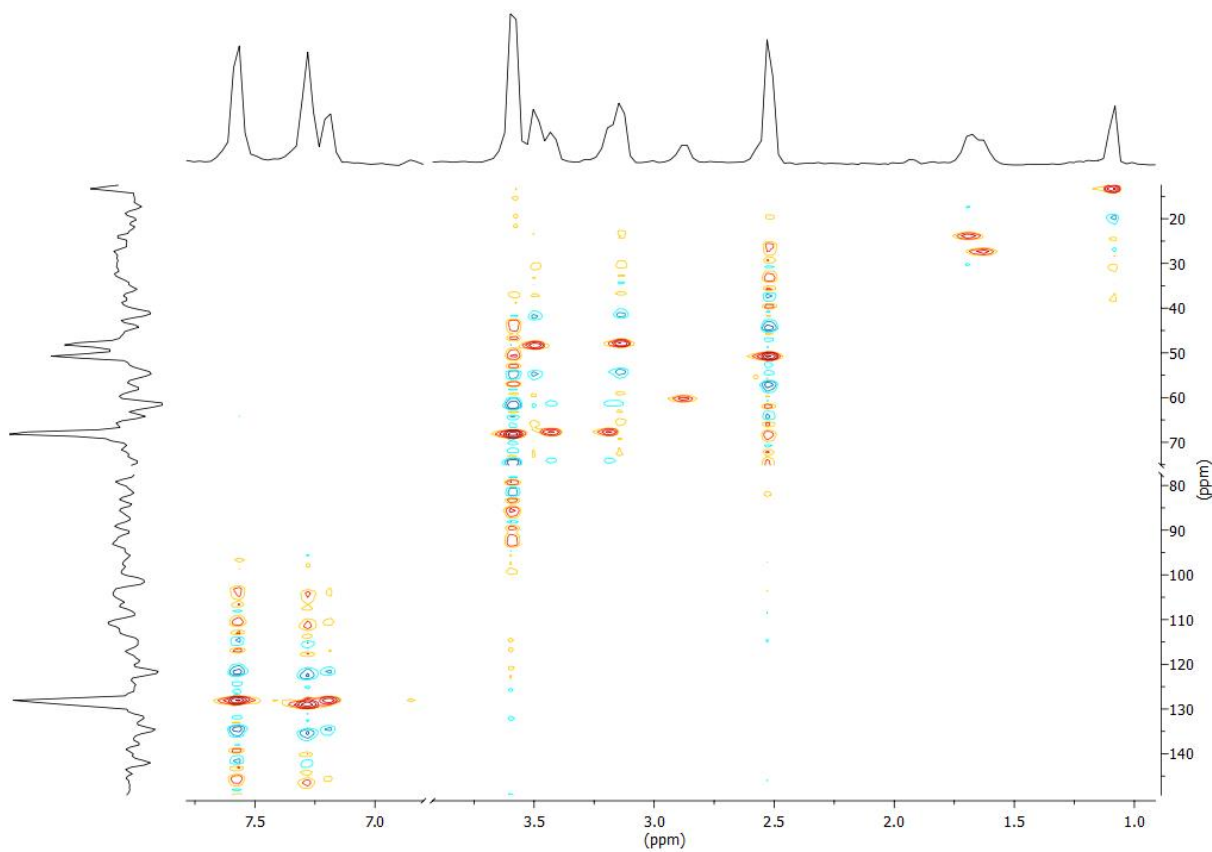

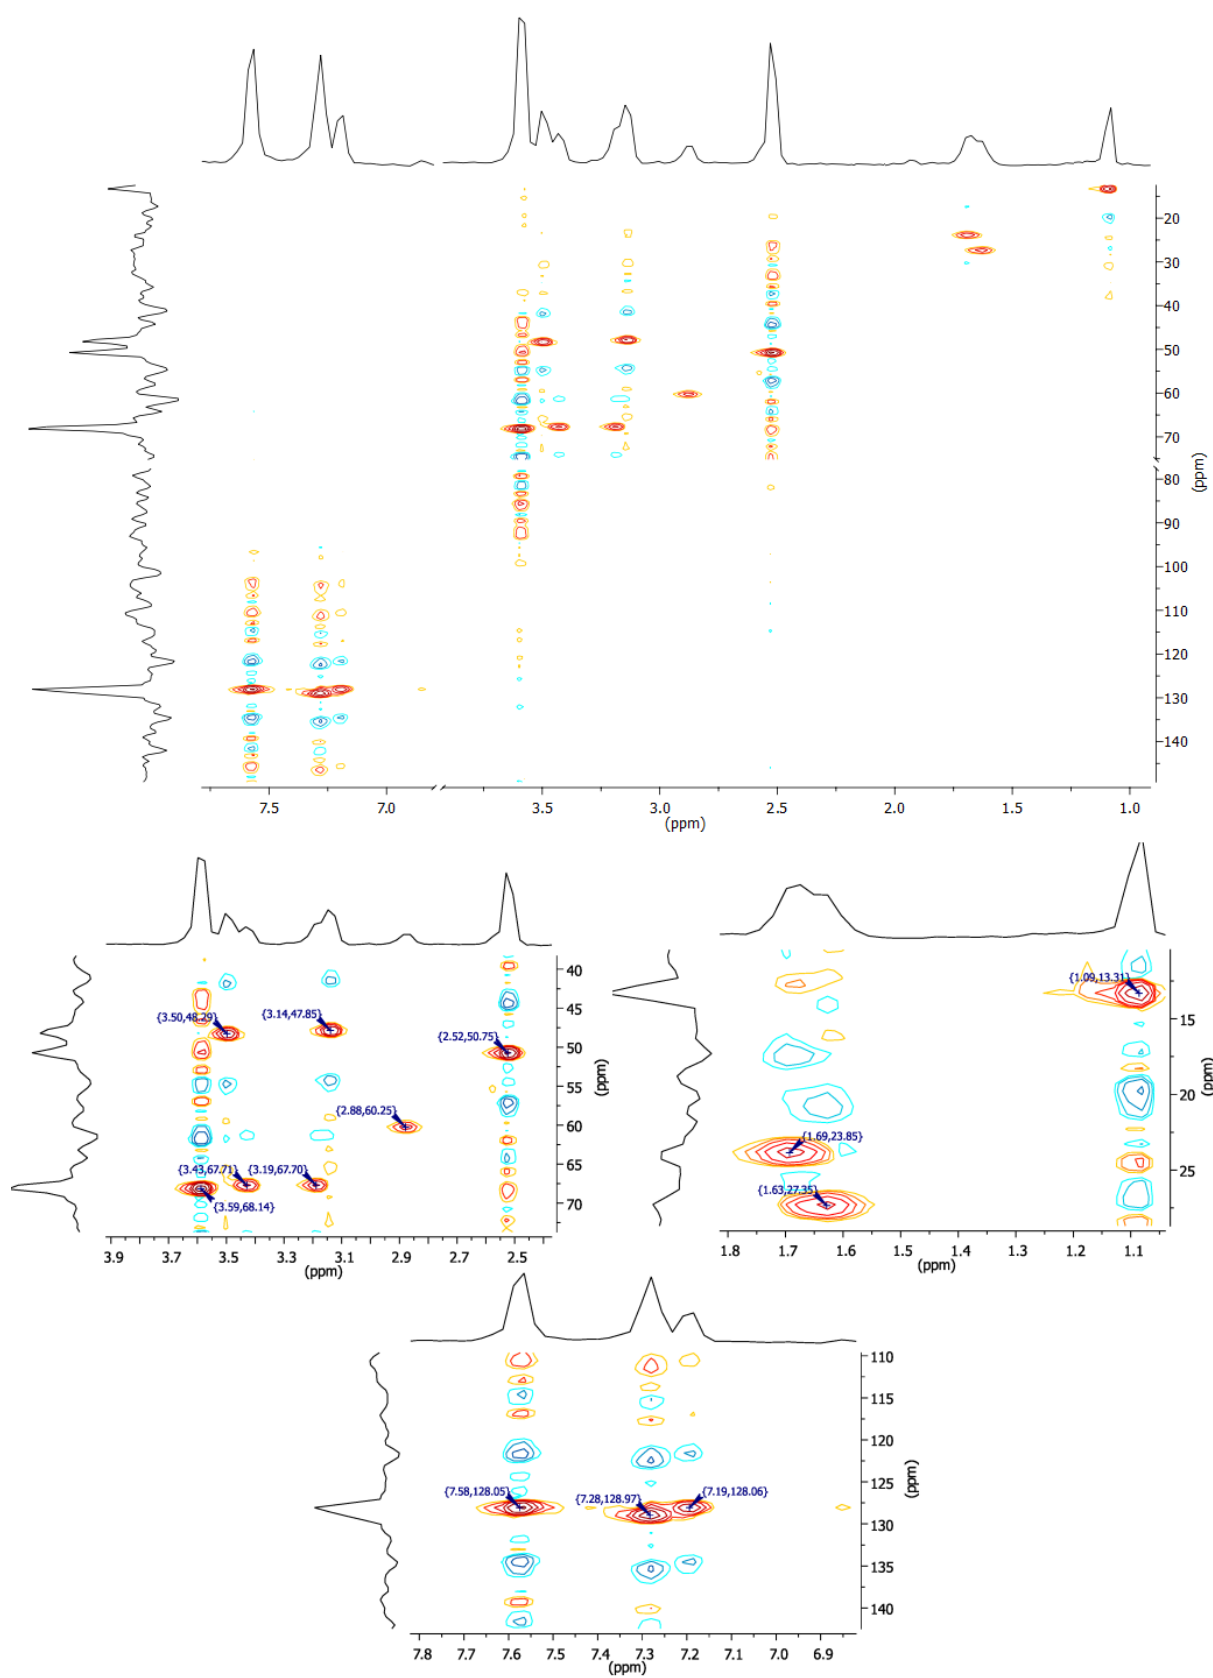

### MS spectrum of *rac*-**10** (ESI-TOF)

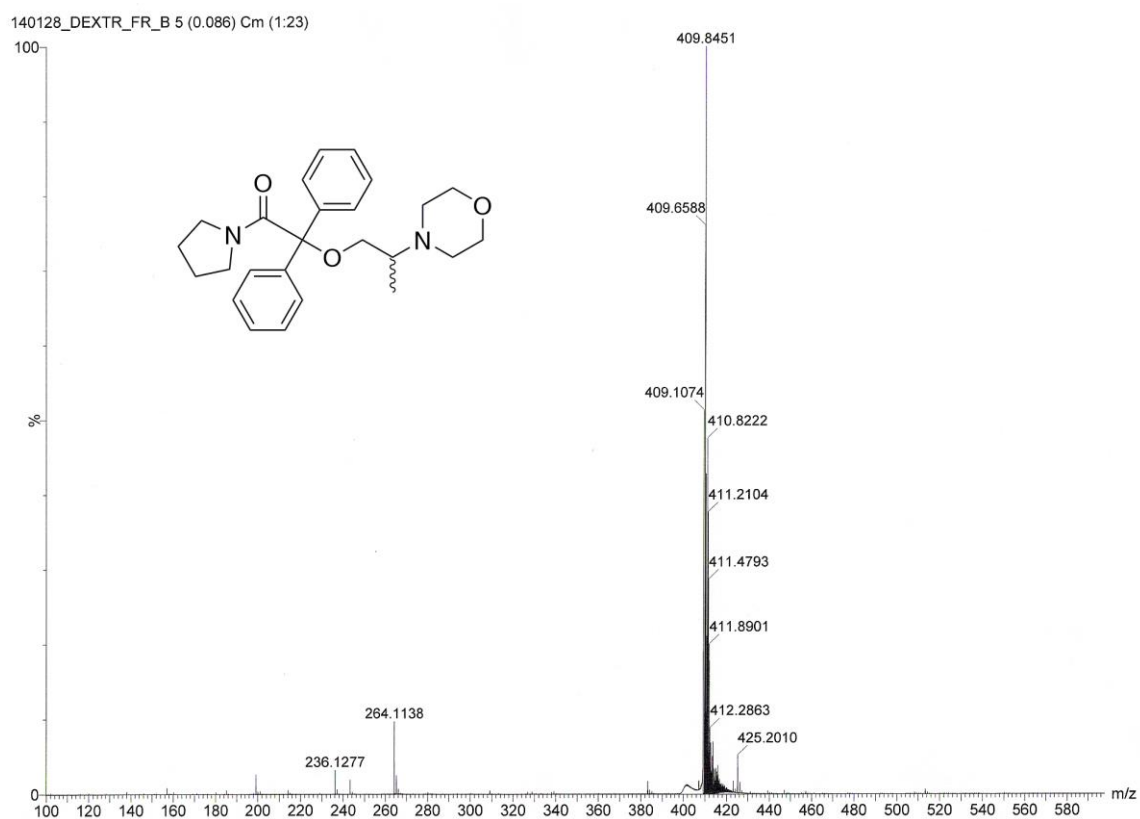

### GC-MS spectrum of *rac*-**10** (EI)

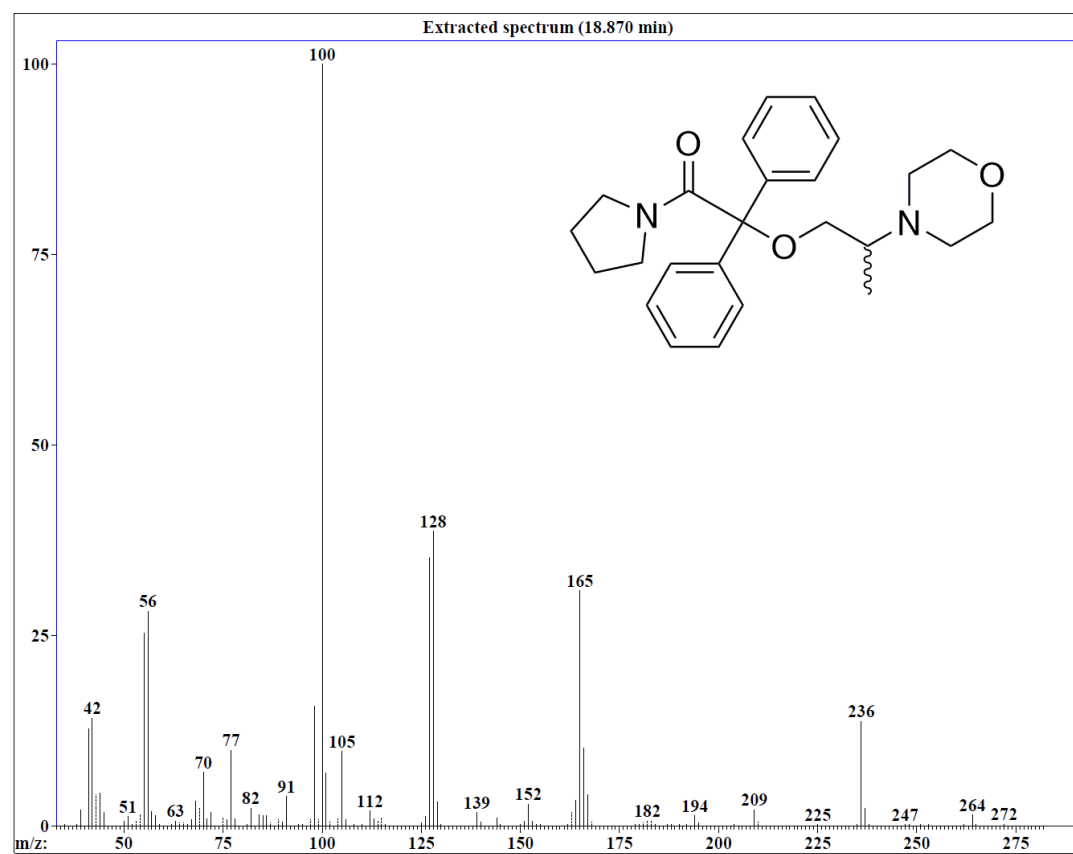

# FT-IR spectrum of *rac*-**10** (neat)

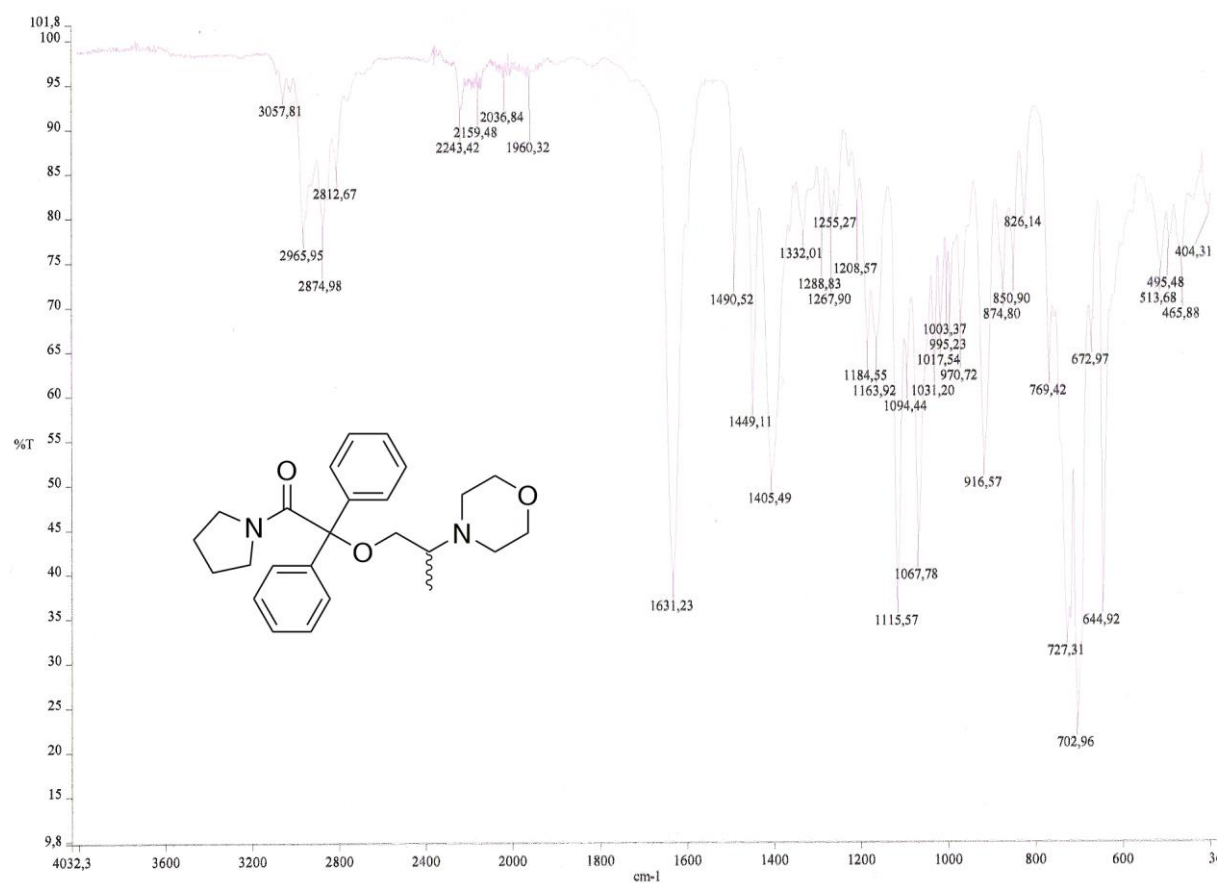

Supplement: s1 [file s1]
